# 1 Cerebro-cerebellar networks facilitate learning 2 through feedback decoupling

3 Ellen Boven<sup>1,2#</sup>, Joseph Pemberton<sup>1#</sup>, Paul Chadderton<sup>2</sup>, Richard Apps<sup>2</sup>, Rui Ponte Costa<sup>1\*</sup>

4 <sup>1</sup>Bristol Computational Neuroscience Unit, Intelligent Systems Lab, Faculty of Engineering, University of  
5 Bristol, Bristol, BS8 1TH, United Kingdom; <sup>2</sup>School of Physiology, Pharmacology and Neuroscience,  
6 Faculty of Life Sciences, University of Bristol, Bristol, BS8 1TH, United Kingdom

7  
8 **Abstract** Behavioural feedback is critical for learning in the cerebral cortex. However, such feedback is often not  
9 readily available. How the cerebral cortex learns efficiently despite the sparse nature of feedback remains unclear. In-  
10 spired by recent deep learning algorithms, we introduce a systems-level computational model of cerebro-cerebellar  
11 interactions. In this model a cerebral recurrent network receives feedback predictions from a cerebellar network,  
12 thereby decoupling learning in cerebral networks from future feedback. When trained in a simple sensorimotor  
13 task the model shows faster learning and reduced dysmetria-like behaviours, in line with the widely observed func-  
14 tional impact of the cerebellum. Next, we demonstrate that these results generalise to more complex motor and  
15 cognitive tasks. Finally, the model makes several experimentally testable predictions regarding (1) cerebro-cerebellar  
16 task-specific representations over learning, (2) task-specific benefits of cerebellar predictions and (3) the differential  
17 impact of cerebellar and inferior olive lesions. Overall, our work offers a theoretical framework of cerebro-cerebellar  
18 networks as feedback decoupling machines.

## 19 20 Introduction

21 Learning ultimately depends on environmental feedback<sup>1,2</sup>. To learn efficiently animals and humans must make good  
22 use of this feedback to update their internal models of the world<sup>3,4</sup>. However, external sensory feedback is inherently  
23 delayed and incomplete, thereby reducing the rate and extent of learning in neuronal circuits<sup>3</sup>. These observations  
24 suggest that the brain may employ a general mechanism to facilitate learning when external feedback is not readily  
25 available.

26 The cerebellum is a region of the brain specialised in building predictive models<sup>4,5</sup>. In the classical view, the cere-  
27 bellum learns predictive internal models on the motor domain<sup>5-10</sup>. Consistent with this view are a large body of  
28 experimental observations for which cerebellar dysfunction causes motor learning deficits. However, more recently,  
29 cerebellar dysfunction has also been associated with impaired language processing, cognitive associative learning  
30 and working memory<sup>11-15</sup>. Moreover, an increasing body of behavioural<sup>12,14,16-20</sup>, anatomical<sup>21,22</sup> and imaging<sup>23</sup> stud-  
31 ies alludes to a role of the cerebellum in cognition in animals and humans. Taken together, these studies suggest that  
32 the cerebellum learns internal models for both motor and non-motor functions in line with the proposed *universal*  
33 *functional* role of the cerebellum across the brain, including the cerebral cortex<sup>9,24-26</sup>.

34 Despite growing experimental evidence there are no specific computational models aiming to capture the func-  
35 tional roles of cerebro-cerebellar interactions during learning of motor and non-motor tasks. Building on recent deep  
36 learning developments we theorise that the cerebellum predicts future cerebral feedback signals given current cere-  
37 bellar activity. This feedback predicted by the cerebellum is then sent back to the cerebral network to drive learning.

---

#These authors contributed equally (order is alphabetical).

\*For correspondence: [rui.costa@bristol.ac.uk](mailto:rui.costa@bristol.ac.uk)

38 Specifically, we model a given cerebral area as a recurrent neural network<sup>27-30</sup> which receives feedback predictions  
 39 from a feedforward, cerebellar, network<sup>6,7</sup>. This view of cerebro-cerebellar interactions is in line with the classical for-  
 40 ward models of cerebellar function<sup>6,7</sup>, in that in our model the cerebellum makes forward predictions (i.e. generates  
 41 cerebral feedback predictions) given current cerebral activity.

42 We test our model on a range of sensorimotor, pattern recognition and visual-language tasks. Using these tasks  
 43 we demonstrate that cerebellar predictions conveyed to the cerebral cortex facilitate learning. Moreover, models  
 44 without a cerebellar component exhibit slower learning and dysmetria-like behaviours, consistent with a wide range  
 45 of behavioural observations<sup>11,14,31,32</sup>. Our results indicate that the cerebellar-mediated facilitation of cerebral learning  
 46 relies on the ability of the cerebellum to provide effective cerebral feedback predictions. Finally, we make several  
 47 experimentally testable predictions regarding cerebro-cerebellar representations, task-specific temporal feedback,  
 48 cerebro-cerebellar activity coupling and the different contributions of cerebellar output and inferior olive lesions for  
 49 task learning.

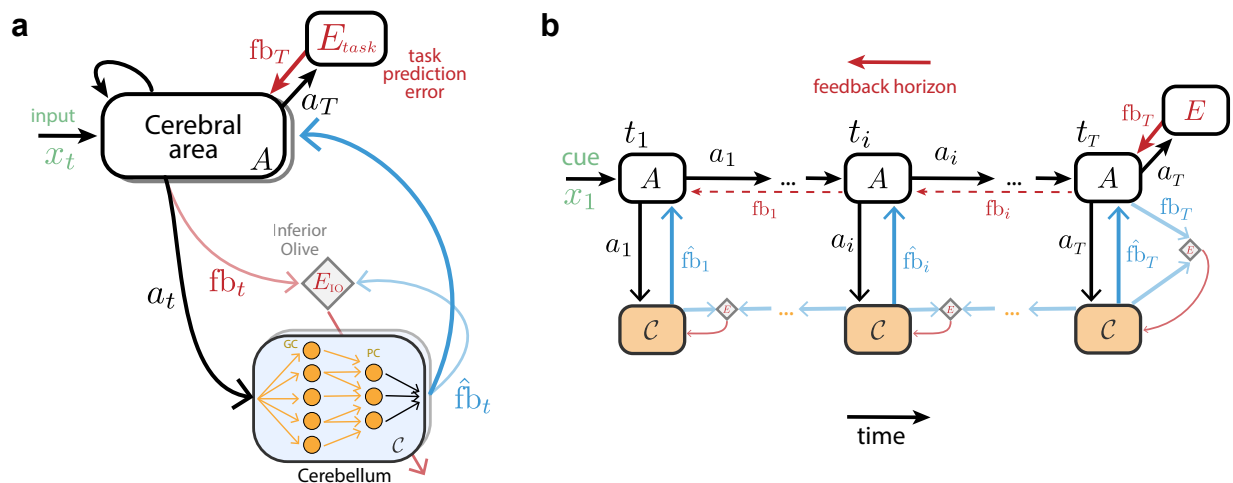

**Figure 1. Cerebro-cerebellar networks as feedback prediction machines.** (a) A recurrent cerebral cortical network  $A$  learns through feedback given by a task-specific prediction error module  $E_{task}$  computed at the end of a task  $fb_T$  (top red arrow). The cerebellum aims to continuously predict the feedback expected by the cerebral network  $\hat{fb}_t$  (blue) given current cerebral activity  $a_t$  (black). The cerebellar network (i.e. granule cells; GC and Purkinje cells; PC) learns through prediction errors (bottom red arrow) computed at the inferior olive (diamond) by comparing predicted feedback  $\hat{fb}_t$  with actual feedback  $fb_t$  (light blue). Shaded boxes represent multiple cerebral areas and cerebellar modules that may be interacting in parallel (see Fig. S1 for the same framework applied to decoupling across multiple brain areas). (b) Example of cerebro-cerebellar model unfolded in time in which the cerebral network learns to associate a cue given at  $t_1$  ( $x_1$ , green) with feedback received at the end of the task,  $t_T$  (cf. Fig. 2). At the end of the task the cerebral network  $A$  receives external sensory feedback  $fb_T$  (red), which is transmitted to the cerebellar network as cerebral feedback  $fb_T$  (light blue). Here we highlight a case of cerebral feedback horizon stopping at the end of the task  $T$ , but feedback may also be available earlier in the task (dashed red arrows). The cerebellum generates cerebral feedback predictions  $\hat{fb}_t$  (blue) given cerebral activity  $a_t$  (black), and learns using inferior olive (diamond) error signals (red arrow). Before  $t_T$  cerebral feedback signals may not be readily available, thus the cerebellum learns through self-predictions. In this case the inferior olive (diamond) compares old cerebellar predictions (e.g.  $\hat{fb}_i$ ) with the new one (e.g.  $\hat{fb}_T$ ) to generate cerebellar learning signals (red arrow; see main text and Methods for details).

## 50 Results

### 51 A systems-level computational model of cerebro-cerebellar interactions

52 In order to understand how cerebellar computations may shape cerebral processing, we introduce a cerebro-cerebellar  
 53 systems-level model based on a recent deep learning algorithm<sup>33</sup>. In line with previous work we model a given cere-  
 54 bral cortical area  $A$  as a recurrent neural network (RNN)<sup>27-30</sup> which is coupled with a cerebellar module  $C$  – cerebro-  
 55 cerebellar RNN (ccRNN). We model the cerebellar module as a simple feedforward network  $C$  (Fig. 1a) in line with the  
 56 cerebellar architecture<sup>6,7,9</sup>. The input layer of the cerebellar network receives cerebral cortical activity  $a$  and models  
 57 the Granule cells (GCs), which project to the output layer, modelling the Purkinje cells (PCs) that provide cerebellar  
 58 predictions back to the cerebral cortex (Methods). To capture the dimensionality expansion observed between cere-

59 bral and cerebellar networks<sup>34,35</sup> we constrain our model with  $M \gg N$ , where  $M$  corresponds to the number of GCs  
60 and  $N$  the number of cerebral neurons and use the same ratio found experimentally  $\frac{M}{N} \sim 4$ .

61 We study the behaviour of our model in a range of tasks. To train the model we use a prediction error function  $E_{\text{task}}$   
62 which compares the model output with task-specific external feedback. Using standard gradient descent methods we  
63 generate feedback signals of a specific temporal horizon (see example of a RNN unrolled in time in Fig. 1b),  $fb_t$ , which  
64 is then used to update the RNN input and recurrent weights (Fig. 1a; see Methods). For computational efficiency and  
65 in line with previous models we use a time-discrete approximation of time-continuous RNN models<sup>28</sup>.

66 Following our theoretical proposal the cerebellar module  $C$  continuously learns to predict cerebral feedback  $fb_t$   
67 given cerebral cortical activity  $a_t$ . The cerebellar network is optimised through error signals computed by comparing  
68 the actual cerebral feedback  $fb_t$  at time  $t$  with the cerebellar predicted feedback  $\hat{fb}_t$ . We postulate that this compari-  
69 son is done in an inferior olive-like structure,  $E_t^C = (fb_t - \hat{fb}_t)^2$ , that generates error signals which are used to optimise  
70 the cerebellar network (see Methods). However, similar to the external feedback, actual cerebral feedback is not al-  
71 ways available, which would impact the ability of the cerebellar network to learn online to produce effective feedback  
72 signals. To circumvent this problem we propose that the cerebellum learns using its own feedback predictions when  
73 cerebral feedback is not available (Fig. 1b)<sup>33</sup>. This leads to the following target feedback  $\bar{fb}_t \sim fb_t + C(a_{t+1})$  where  
74  $fb_t$  is the true cerebral feedback and  $C(a_{t+1}) = \hat{fb}_{t+1}$  is a self-prediction term which enables the cerebellum to learn  
75 online (see full details in Methods).

## 76 Cerebro-cerebellar model facilitates learning in a simple sensorimotor task

77 Inspired by classical sensorimotor studies in the cerebellum, we first test a simple visuo-motor task<sup>11,31,32,36,37</sup>. In this  
78 task the model must draw a straight line in a two-dimensional space towards one of seven target locations given a  
79 target-specific cue at the start of the task (Fig. 2a, top left). We train a cerebro-cerebellar RNN (ccRNN) and a cerebral-  
80 only RNN (cRNN) to perform this task (see full details in Supplementary). To train the models we provide teaching  
81 feedback by comparing the cerebral network output with the optimal trajectory (i.e. a straight line between starting  
82 and end points; Fig. 2a). In addition, this feedback is delayed with respect to the initial cue and incomplete (i.e. only  
83 available every few time steps). This models a more realistic setting in which task feedback is not always readily  
84 available. When this feedback is available at time  $t$  we calculate the prediction error as  $E_{\text{task}} = (l_t - \hat{l}_t)^2$ , where  $l_t$  and  
85  $\hat{l}_t$  denote the desired and current model two-dimensional trajectory (i.e. set of feedback points; cf. Fig. 2 schematic),  
86 given by a linear readout on the network activity  $a_t$  (Methods). In particular, here we consider a feedback interval at  
87 every other time step for both cRNN and ccRNN (but see Fig. 4 for more general cases).

88 During learning the ccRNN model achieves near-zero error after a relatively small number of training sessions,  
89 while the cRNN, which lacks the cerebellar component, also learns but more slowly and with higher variability (Fig. 2b).  
90 These observations are in line with a large body of cerebellar experiments<sup>11,31,32</sup>. In addition, we also observe differ-  
91 ences at the level of model output trajectories. While the ccRNN produces smooth and straight trajectories, the cRNN  
92 displays a much more variable trajectory towards all targets (Fig. 2b). Due to the sparse task feedback in the absence  
93 of a cerebellar network, the cRNN is not able to learn a correct trajectory in points for which there is no direct feed-  
94 back thus overshooting the target trajectory. In cerebellar patients, this effect is referred to as dysmetria<sup>38</sup> which in  
95 the motor domain results in ataxia. Ataxia is the lack of coordination and fine control during voluntary movements, a  
96 defining symptom resulting from cerebellar malfunction<sup>11,38</sup>. To evaluate the degree of dysmetria-like output in our  
97 models we measure the error between the model output and the optimal trajectory (i.e. a straight line in this case;  
98 see Methods). When applying this measure, the ccRNN shows a clear reduction in ataxia-like behaviour compared to  
99 cRNN (Fig. 2c).

100 To highlight the conditions for which the cerebellum may facilitate learning in cerebral networks we test different  
101 lengths of cerebral feedback horizon (Methods). Our results show that the ccRNN only facilitates learning for short to  
102 medium feedback horizons (<50%, Figs. 2d, S2). These results suggest that the cerebellum is particularly important  
103 for cerebral learning in conditions in which cortical networks do not have internal effective feedback available for  
104 learning. This is consistent with experimental observations showing that the cerebellum becomes more important  
105 in the presence of challenging task conditions for which cerebral feedback might be short<sup>39</sup>. In contrast, for long  
106 cerebral feedback, having a cerebellar module harms learning. In this case the cerebral network has the level of  
107 feedback required to learn effectively, thus the noise inherent in the cerebellar feedback can impair learning. This  
108 observation suggests that the brain may use intermediate brain structures, such as the thalamus and the pons to

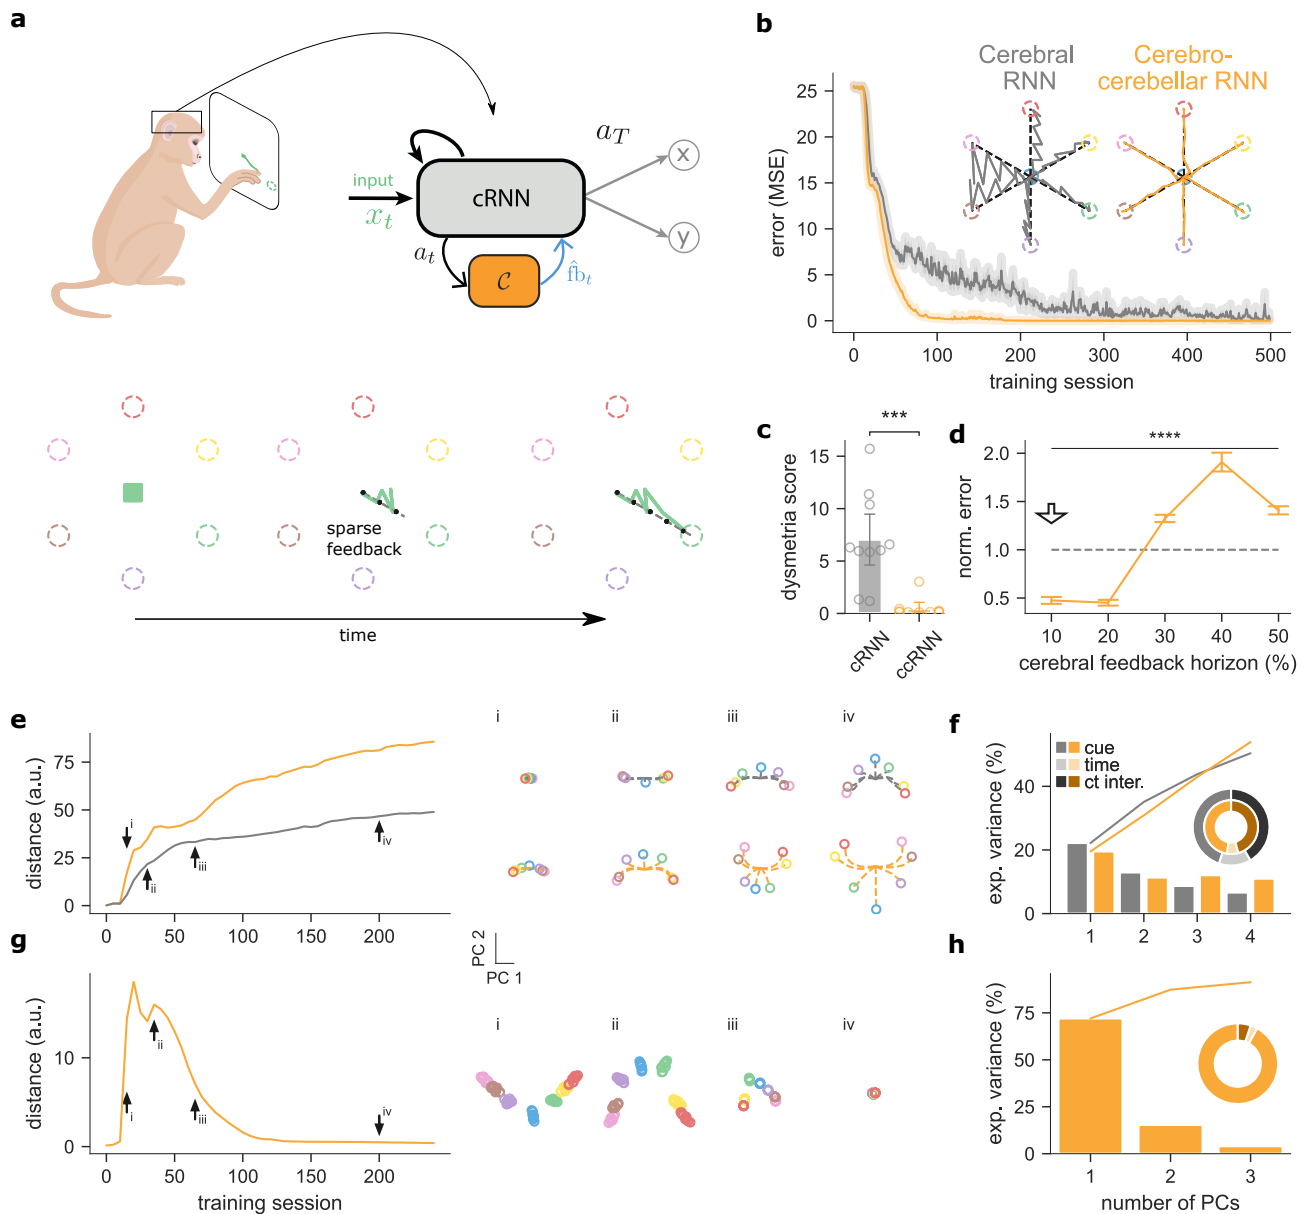

**Figure 2. Cerebro-cerebellar model improves learning in a simple line drawing sensorimotor task.** (a) Schematic of a macaque monkey performing a simple line drawing task (top left). A cerebro-cerebellar RNN (ccRNN) in the macaques brain receives the cue-specific input and learns to produce the desired trajectory (top right). There are 6 possible targets (coloured dashed circles) and feedback (dashed black line) is provided at a regular interval (bottom; see Methods). In the example shown the model must draw a straight line towards the green target. (b) Error between model output and desired target trajectories for cerebellar RNN (gray, cRNN) and cerebro-cerebellar RNN (orange, ccRNN). Insets: Model trajectory produced for all cues after learning. (c) Dysmetria score for cRNN and ccRNN. The dysmetria score quantifies how smooth the movement is after learning (Methods). (d) Normalized model mean squared error (MSE) after learning for different cerebral feedback horizons. Feedback horizon is denoted as percentage of the total task sequence. Arrow indicates feedback horizon used by the cerebral network in the other panels. (e) Euclidean distance between the two leading cue principal components for the recurrent neural network in both the cRNN (grey) and ccRNN (orange) models. Arrows highlight training sessions of cue-specific principal components (PCs) plotted on the right for early (i), early-mid (ii), mid (iii) and late (iv) learning, for both cRNN (top) and ccRNN (bottom). (f) Explained variance of the RNN for both models cRNN (gray) and ccRNN (orange). Bar plot shows explained variance for the top five cue-specific PCs. Circular plot shows the total explained for cue (medium-dark colours), time (light colours) and cue-time interaction (dark colours) task variables. (g) Euclidean distance between the different cue-specific two-dimensional components for the cerebellar network (orange, ccRNN model). Arrows indicate training sessions highlighted on the right as in (e). (h) Explained variance of the cerebellar network as in (f). \*\*\*:  $p < 0.001$ , \*\*\*\*:  $p < 0.0001$ . Error bars represent mean  $\pm$  SEM across 10 different initial conditions of the model.

109 gate cerebro-cerebellar interactions depending on task properties (see Discussion).

110 Next, to gain insight into how cerebral and cerebellar neuronal representations evolve jointly during learning, we  
111 use a dimensionality reduction method (demixed principal component analysis (PCA); see Methods). Demixed PCA  
112 (dPCA) enables us to extract low-dimensional neuronal representations that capture maximum variance across task  
113 variables. First, we focus on the two most informative cue-specific principal components using the neural activities  
114 of the recurrent neural network for both cRNN and ccRNN (see all components in Figs. S3,S4 and S5). Next, we  
115 calculated the two-dimensional Euclidean distance across the 7 different possible cues (Methods). Our results show  
116 that the ccRNN cerebral network is characterised by a stronger increase in separation of stimulus components over  
117 learning when compared to the cRNN cerebral network (Fig. 2e). To contrast task-specific components with general  
118 temporal information, we compare the level of cue-specific and time-specific explained variance in both models.  
119 ccRNN captures overall more cue-specific explained variance when compared with cRNN (Fig. 2f) which demonstrates  
120 that ccRNN encodes more task-relevant information, which requires the model to associate the cue information with  
121 specific output trajectories. Next, we applied dPCA to the activity of cerebellar neurons. Since the cerebellar module  
122 facilitates cue-to-target learning we expected cerebellar representations to be mostly dominated by task-specific  
123 information. This is indeed what we find, our results show that the distance between cue-related components is  
124 stronger during periods of high learning (Fig. 2g; compare with Fig. 2b), and that most of the variance is explained by  
125 cue-specific PCs (95.4%; Fig. 2h).

126 Overall, our results suggest that in the context of a simple sensorimotor task, cerebellar-mediated decoupling of  
127 cerebral feedback enables faster learning and smoother motor trajectories. In addition, it makes a number of ex-  
128 perimentally testable predictions about the evolution of task-specific cerebro-cerebellar representations throughout  
129 learning.

### 130 **Cerebro-cerebellar model improves learning in complex sensorimotor and discrimination tasks**

131 Next, to test whether the results from the simple visuomotor task generalise to more realistic settings we explore  
132 a range of more advanced sensorimotor tasks. We introduce two tasks in which the models are trained to draw  
133 digits given complex spatiotemporal sensory inputs. For these tasks we build on a standard machine learning dataset  
134 consisting of 10 (from 0 to 9) two-dimensional handwritten digits (see example in Fig. 3a; MNIST dataset<sup>40</sup>). In contrast  
135 to the previous task in which sensory input was only provided at the start of the task, here the model receives a part  
136 of a handwritten digit at any given point in time (i.e. a row of 28 pixels; see Methods). We refer to this task setting  
137 in which input is provided over time as *online*. Given this input then we consider two task variants (Fig. 3a) in which  
138 the model has to either (i) draw a straight line (online line drawing (LD) visuomotor task) or (ii) draw a digit (online  
139 digit drawing (DD) visuomotor task). Both tasks provide a more realistic model of drawing tasks (Fig. 2) in which lines  
140 must be drawn given complex continuous sensory input. As in the previous task we consider cases of sparse task  
141 feedback.

142 As in the simple visuomotor task, here the ccRNN learns faster (Fig. 3b) than cRNN while showing a strong re-  
143 duction in dysmetria-like trajectories (Fig. 3c). The ccRNN also facilitates learning when in the presence of short to  
144 medium feedback horizon in the cerebral network (Fig. 2d), and we find that dysmetria-like trajectories are reduced  
145 in the ccRNN model (Fig. 3c).

146 To test whether our observations in the sensorimotor tasks generalise to other task domains we train the model  
147 in a visual discrimination task. In this task the model receives the same handwritten digits presented sequentially  
148 over time but now must discriminate between the 10 classes of digits (online visual discrimination task, Fig. 3a). In  
149 line with the results in the visuomotor tasks, we find that ccRNN also facilitates learning in this task, achieving higher  
150 accuracy after only 10 training sessions (Fig. 3b). Here we use the certainty the model has about the current class  
151 as a measure of dysmetria of thought<sup>41</sup> (see Methods). Similarly to the tasks above, we find that dysmetria-like  
152 behaviours are reduced in the ccRNN model, which in this case shows that model produces more accurate decisions  
153 (Fig. 3c). Finally, in line with previous tasks a cerebellar module facilitates learning in the presence of weak cerebral  
154 feedback (Figs. 3d, S6). These results are in line with the growing number of studies implicating the cerebellum in  
155 sensory discrimination and decision making tasks<sup>19,42,43</sup>.

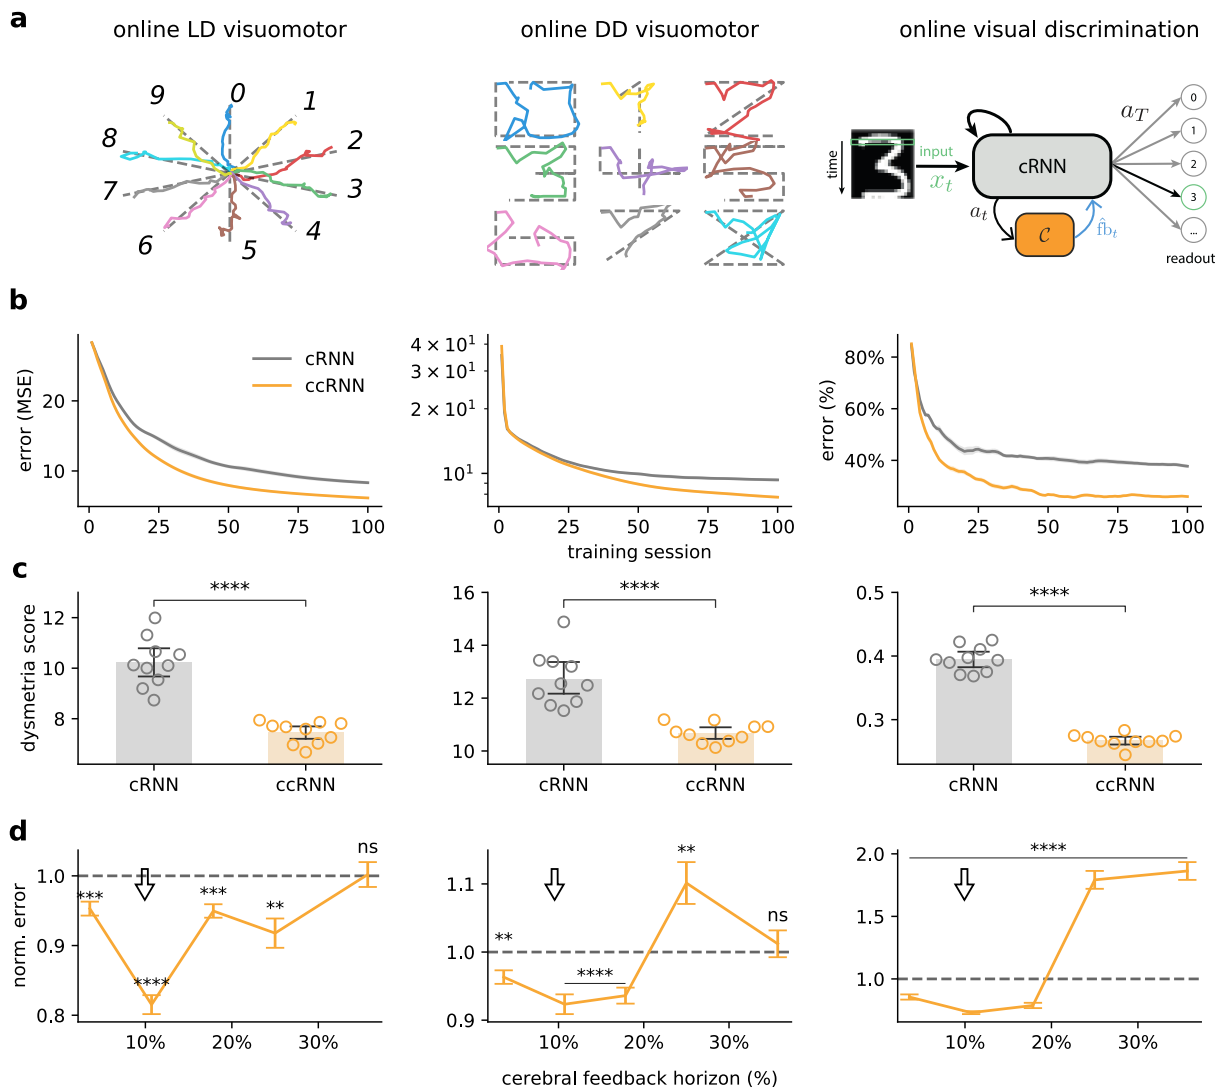

**Figure 3. Cerebro-cerebellar model improves learning in online complex sensorimotor and sensory discrimination tasks.**

(a) Model behaviour across three tasks using a dataset of handwritten digits, each presented sequentially to the network (Methods and main text). Online line drawing (LD) visuomotor task: given temporally varying visual input the model is trained to draw a straight line (top left). Online digit drawing (DD) visuomotor task: given temporally varying visual input the model is trained to draw a digit following a template (top middle); Target trajectories are in dotted grey and model output is coloured by digit. Online visual discrimination task: pattern recognition variant in which the model is trained to discriminate between 10 different digits given as input sequentially (a row at a time; green box; top right). (b) Learning curves for the three tasks for both cerebral RNN (gray, cRNN), cerebro-cerebellar RNN (orange, ccRNN). The cerebral network in all tasks uses approx. 10% of the cerebral feedback horizon (cf. d). (c) The dysmetria score quantifies the irregularity in movement during the testing phase of the model (online LD and DD visuomotor tasks) or the uncertainty in the sensory discrimination (online visual discrimination task). (d) CcRNN model performance relative to cRNN across different degrees of cerebral feedback horizon. ns denotes no significance ( $p=0.921$  in the online LD visuomotor and  $p=0.567$  in the online DD visuomotor). Arrow indicates the feedback horizon used in (b). \*\*:  $p<0.001$  \*\*\*:  $p<0.0001$ , \*\*\*\*:  $p<0.0001$ . Error bars represent mean  $\pm$  SEM across 10 different initial conditions of the model.

### 156 Cerebellar-mediated learning facilitation depends on task feedback interval

157 In sensorimotor tasks there are physiological constraints inherent to animals and humans which impose limits on  
 158 the rate at which external feedback is available<sup>44-46</sup>. To determine the rate of external feedback for which cerebel-  
 159 lar predictions are most valuable we trained the model in two tasks (simple LD and LD visuomotor tasks) with a  
 160 range of external feedback intervals. This feedback interval defines the rate at which external feedback is available  
 161 for learning, resembling sensorimotor feedback which is typically sporadic rather than continuous<sup>11,47,48</sup>. We find

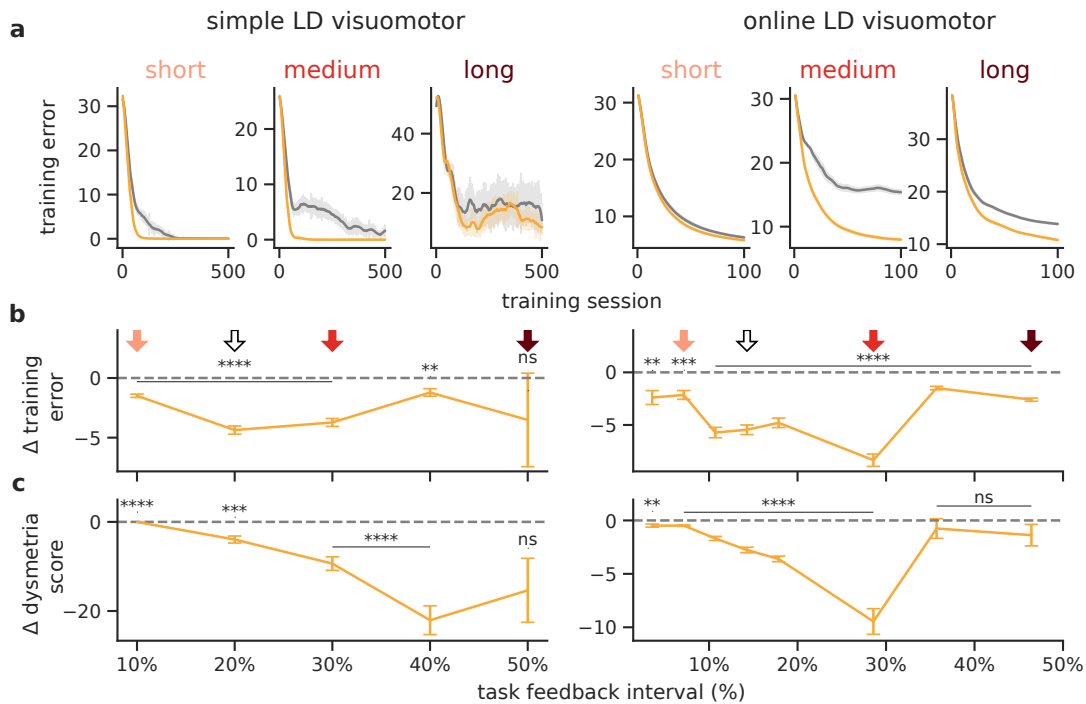

**Figure 4. Cerebellar-mediated facilitation of learning depends on task feedback interval.** (a) Learning curves for short (light red), medium (red) and long (dark red) levels of feedback interval for both the simple and online LD visuomotor tasks and both models cRNN (gray) and ccRNN (orange). Degrees of redness (b) Difference in task error between ccRNN and cRNN for varying degrees of task feedback intervals (not significant,  $p=0.406$ ). Degrees of red in arrows indicate the respective interval in (a) while the white arrow indicates the feedback interval used in Fig. 2 and Fig. 3, respectively. Task feedback interval given as a percentage of the total task time. (c) Difference in dysmetria score between for varying degrees of task feedback interval (not significant,  $p=0.0577$  for simple LD and  $p=0.444$  (40%),  $p=0.209$  (50%) for online LD). \*\*:  $p<0.01$ , \*\*\*:  $p<0.001$ , \*\*\*\*:  $p<0.0001$ . Error bars represent mean  $\pm$  SEM across 10 different initial conditions.

162 that when external feedback is given at short intervals there is little advantage of the feedback predictions from the  
 163 cerebellar component for both the simple LD and online LD visuomotor tasks (Fig. 4a,b). When the interval between  
 164 external sensory feedback is increased, the benefits of the cerebellar-to-cerebral feedback predictions for learning in  
 165 the ccRNN model become clear. In contrast, for long feedback intervals the feedback is too infrequent for both cRNN  
 166 and ccRNN to be able to successfully learn the task. Next we evaluate the degree of dysmetria using the metrics in-  
 167 troduced above. We observe qualitatively similar results: a model without a cerebellar network (cRNN) exhibits more  
 168 variable trajectories for medium to long task feedback intervals (Fig. 4a). These results imply that whether cerebellar-  
 169 to-cerebral feedback is beneficial for learning and leads to dysmetria-like behaviours depends on the rate of task  
 170 feedback.

### 171 Similarity between cerebellar and cerebral feedback is task and learning dependent

172 The cerebro-cerebellar facilitation of learning shown above depends on the ability of the cerebellum to provide the  
 173 cerebral network with effective feedback predictions. To study the level of similarity between the cerebellar predicted  
 174 feedback and the theoretically optimal cerebral feedback as provided by gradient descent methods, we calculated  
 175 the cosine similarity between cerebellar predictions and the optimal cerebral feedback in a range of tasks (Methods).  
 176 First, we measure the cosine similarity for tasks in which external sensory feedback is only provided at the end of  
 177 the task – a variant of the simple LD task with feedback only at the end and the online visual discrimination. This task  
 178 setup allows for an easier interpretation of the similarity between cerebellar and cerebral feedback which should  
 179 decay gradually from the end to the beginning of the task sequence. Indeed, we observe that the cerebellar-cerebral  
 180 feedback similarity is higher closer to the point in which external sensory feedback is available (i.e. end of the task;  
 181 Fig. 5a,b top; cf. Figs. 2, 3) and remains high over learning in particular for later points in the task (Fig. 5a,b bottom).

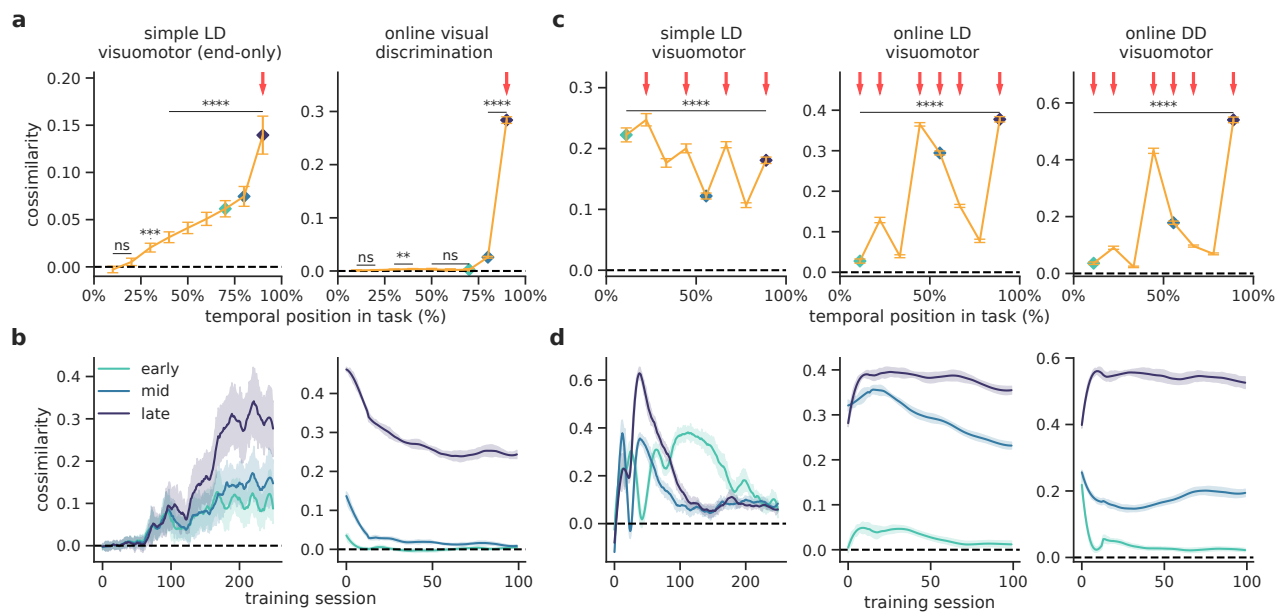

**Figure 5. Similarity between cerebellar and cerebral feedback is task and learning dependent.** (a) Cerebro-cerebellar cosine similarity throughout tasks sequences which do not require intermediate external feedback: simple line drawing with feedback only at the end of the task (LD end-only) and online visual discrimination (n.s. simple LD visuomotor  $p=0.212$  (0%),  $p=0.520$  (25%), n.s. online LD visuomotor  $p=0.312$  (0%),  $p=0.06$  (25%),  $p=0.067$  (50%),  $p=0.386$  (60%). Here and in subsequent panels red arrows indicate points in which external feedback is available. Cosine similarity throughout the tasks is calculated across all training sessions (see Methods). (b) Cerebro-cerebellar cosine similarity over learning for three time points in the task: early (turquoise), mid (blue) and late (purple) in the task (cf. (a)). (c) Cerebro-cerebellar cosine similarity throughout the sequence for tasks with intermediate external feedback: simple line drawing (LD), online LD, online digitdrawing (DD). (d) Cerebro-cerebellar cosine similarity over learning for three different time points in the task (early, mid and late as in (b)). Dashed black line represents zero similarity. \*\*:  $p<0.01$ , \*\*\*:  $p<0.001$ , \*\*\*\*:  $p<0.0001$ . Error bars represent mean  $\pm$  SEM across 10 different initial conditions.

182 Next, we analyse the cosine similarity for conditions in which external feedback is available throughout the task.  
 183 For this we consider the same visuomotor tasks as above (simple LD visuomotor, online LD visuomotor and online LD  
 184 visuomotor). In these tasks we observe more complex dependencies of the cerebro-cerebellar feedback similarity on  
 185 task properties (Fig. 5c,d). For the simple LD task we observe that the predictions made during earlier points in the task  
 186 are more similar than those at later points (Fig. 5c). These results suggest that the model is first learning to align later  
 187 points in the task and gradually learns to adjust earlier points which are closer to the cue-specific information that  
 188 defines the trajectory that the model must take. Interestingly, this behaviour is less prominent in the two other tasks,  
 189 online LD and DD visuomotor tasks, that are characterised by relatively more complex task-specific sensory input  
 190 occurring throughout the task. For these two more complex tasks and in contrast to the simple LD the similarity  
 191 remains high throughout learning for later time points (Fig. 5d), which reflects the more challenging nature of these  
 192 tasks and the need to continuously predict feedback as the task is never fully learnt.

193 These results make non-trivial predictions on when the cerebellum is able to better align with the cerebral feed-  
 194 back, which depend on task complexity, the properties of the task feedback, the exact task position and the learning  
 195 stage.

### 196 Learning shapes cerebro-cerebellar activity coupling

197 The cosine similarity results show that the cerebellar module learns to predict cerebral feedback. Because the cere-  
 198 bellum maps cerebral activity onto (predicted) cerebral feedback, this suggests changes in the coupling between  
 199 cerebellar and cerebral neuronal representations throughout learning. To study the degree of cerebro-cerebellar  
 200 coupling we calculate the pairwise correlations between neurons in the cerebral recurrent neural network and the  
 201 neurons of the cerebellar network (Methods). Although we observe a relatively small rise in the average cerebro-  
 202 cerebellar coupling during the first few training sessions, as training progresses, there is a consistent decrease of the  
 203 correlations (Fig. 6a).



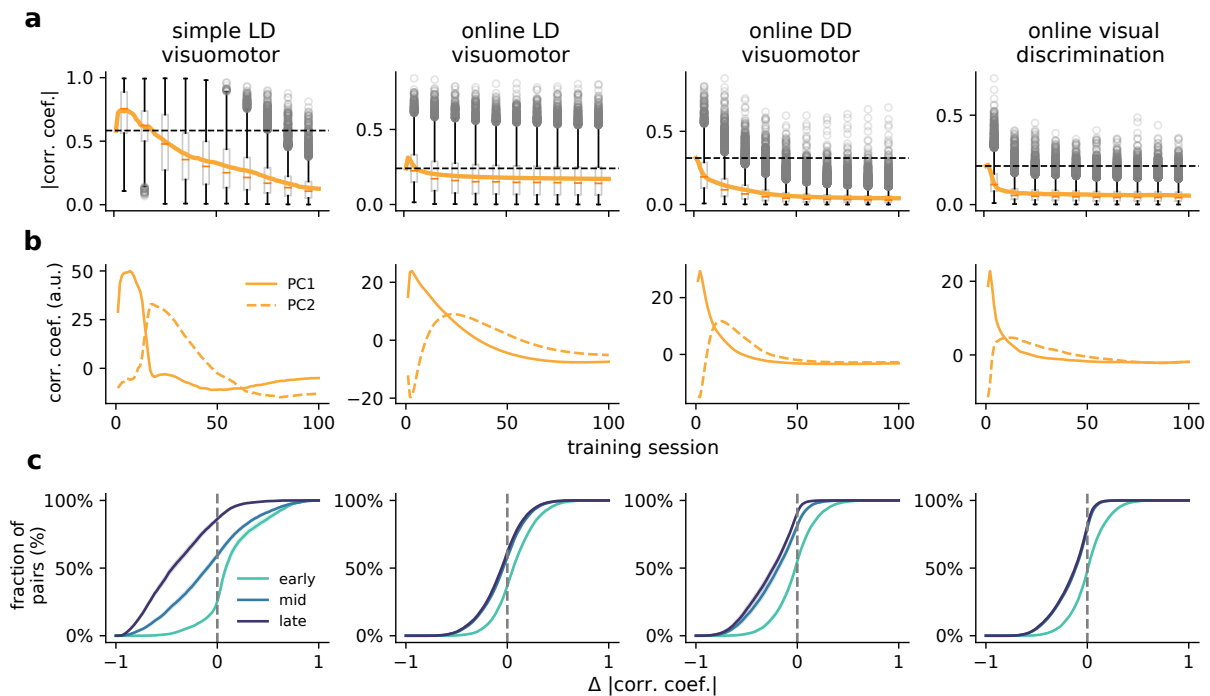

**Figure 6. Cerebro-cerebellar neuronal activity coupling over learning.** (a) Box plot showing the mean and distribution of pairwise cerebro-cerebellar absolute correlation coefficients over learning for four tasks: simple LD, online LD, online DD and online visual discrimination. Fully fixed ccRNN (i.e. without any form of plasticity in both networks) is given for reference (dashed line). (b) Change in first two principal components of cerebro-cerebellar pair-wise correlation coefficients over learning (all components available in Fig. S7). (c) Cumulative plot of cerebro-cerebellar pairs with positive and negative changes in absolute correlation coefficients in early (session 1), mid (session 25) and late (session 80) learning. Error bars represent mean  $\pm$  SEM across 10 different initial conditions.

204 To study more subtle changes in the correlation structure we use standard principal component analysis of the  
 205 pairwise correlations (Fig. 6b). The first principal component reflects the changes in the average cerebro-cerebellar  
 206 coupling (Fig. 6b). The second principal component shows a delayed increase with respect to the first, followed by a  
 207 sustained decrease in the cerebro-cerebellar coupling (see Fig. S7 for remaining components). These results are con-  
 208 sistent with the need for the cerebellum to provide more effective feedback and thus be more coupled in the earlier  
 209 learning phases. To study learning periods of consistent increases or decreases in coupling as training progresses we  
 210 tracked the changes in correlations of cerebro-cerebellar pairs in early, mid and late learning (Figs. 6c). We observe  
 211 that early in learning – when most learning occurs – a large part of the population shows a consistent increase in cor-  
 212 relations, but this rapidly changes as learning progresses with only a very small number of pairs showing increases  
 213 in correlations later in learning.

214 To better assess the contribution of a plastic cerebellum to the cerebro-cerebellar coupling, we analysed a ccRNN  
 215 in which the cerebellum does not learn. In this case we can still observe changes in cerebro-cerebellar coupling over  
 216 learning for some tasks, which reflect changes in the RNN itself, but these are weaker when compared to the normal  
 217 ccRNN (Fig. S8a). In this case cerebro-cerebellar correlations remain high throughout learning compared to a ccRNN  
 218 with a plastic cerebellum. This is supported by their low-dimensional representations: whereas a plastic cerebellum  
 219 leads to principal components that approach near-zero values after the initial learning phase (Fig. 6b, S7), in the case  
 220 of the fixed cerebellum the principal components continue to fluctuate throughout learning (Fig. S8).

221 Although our model suggests a long-term decrease decrease in the cerebro-cerebellar activity coupling, it high-  
 222 lights sub-populations which increase their coupling during specific periods of learning. This observation follows from  
 223 our proposal in that the cerebellum is trained to map cerebral neuronal activity on cerebral feedback which depend  
 224 on learning.

225 **Differential impact of cerebellar output and inferior olive on learning**

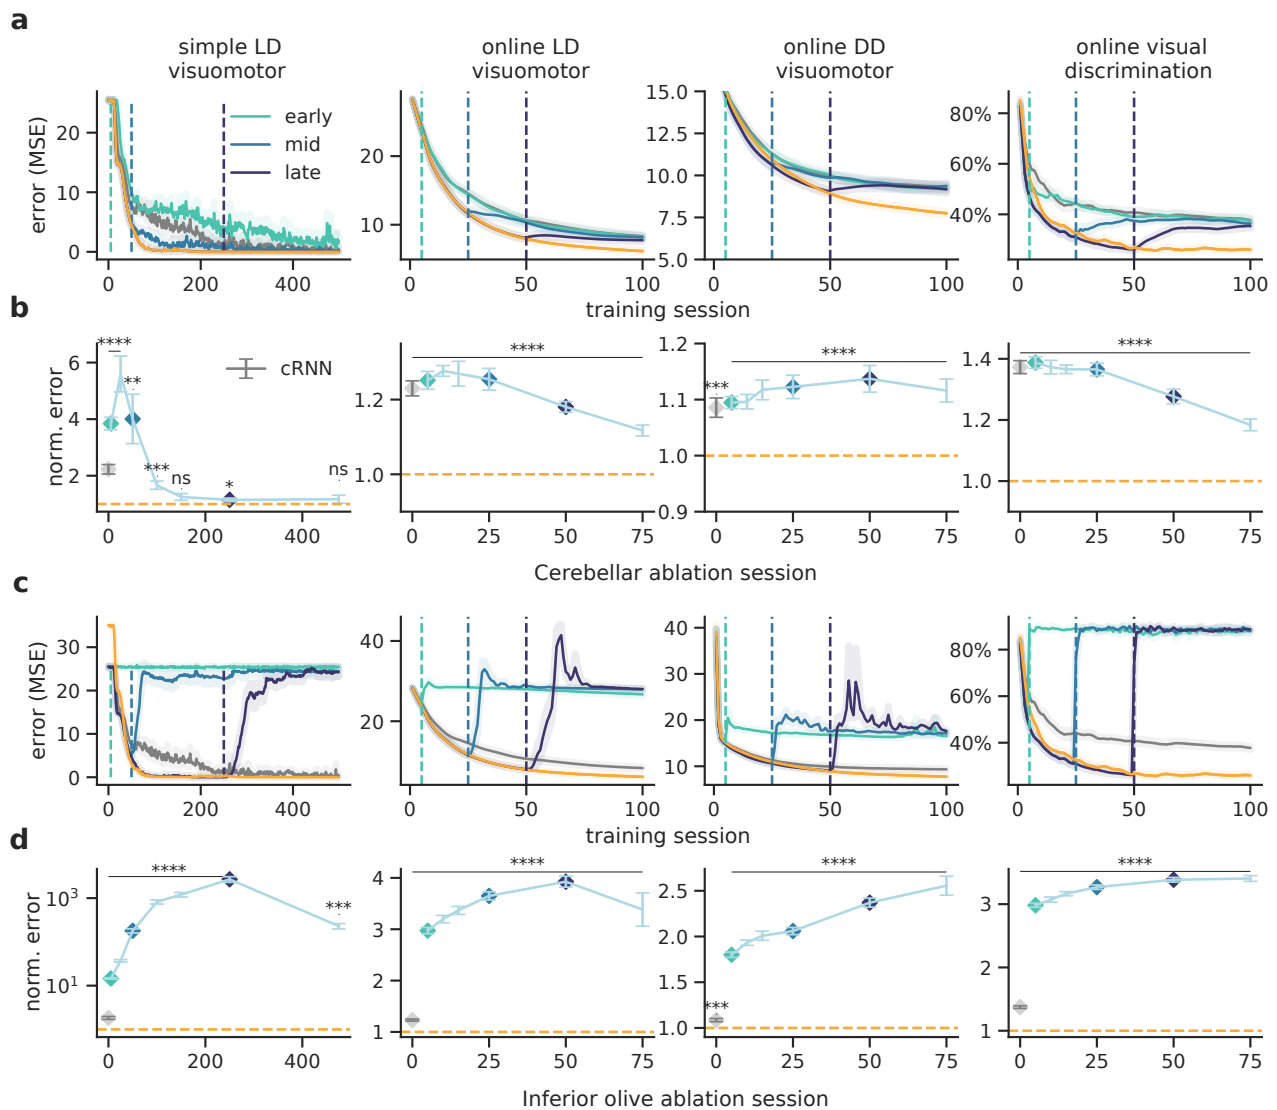

**Figure 7. Inactivating cerebellar output and inferior olive have a differential impact on learning.** (a) Complete cerebellar lesion at different points during learning. Vertical lines represent at which point during training the cerebellar was inactivated in the ccRNN model. In gray and orange show the baseline performances of the cerebral RNN and ccRNN, respectively. (b) Normalised error after cerebellar lesion throughout learning with respect to ccRNN (n.s. simple LD visuomotor  $p=0.062$  (session 150),  $p=0.162$  (session 475)). Gray denotes normalised error for cRNN. (c) Complete inferior-olive lesion at different points during learning. Vertical lines represent point of lesion of the ccRNN model. In gray and orange are shown the baseline performances of the cerebral RNN and ccRNN, respectively. (d) Normalised error after inferior-olive lesion throughout learning with respect to ccRNN. Gray denotes normalised error for cRNN. \*:  $p<0.05$ , \*\*:  $p<0.01$ , \*\*\*:  $p<0.001$ , \*\*\*\*:  $p<0.0001$ . Error bars represent mean  $\pm$  SEM across 10 different initial conditions.

226 In experimental neuroscience a common paradigm is to inactivate the cerebellum in order to study its role in  
 227 learning and behaviour. Here we perform *in silico* lesion experiments to reveal the impact of the modelled cerebellar  
 228 feedback predictions during learning. First, we test cerebellar output lesions at different points in learning. In all  
 229 tasks we observe that inactivating the output of the cerebellar module in early learning impairs further learning  
 230 and performance (Fig. 7a,b). This is expected as the cerebellar network provides feedback predictions that facilitate  
 231 cerebral learning. Interestingly, we observe that when the cerebellum is suddenly removed learning becomes worse  
 232 than the baseline model. This is likely due to the additional time taken to adapt to a new learning trajectory which no  
 233 longer relies on cerebellar prediction. However, cerebellar lesions performed later in learning do not have an impact

234 in the simple LD visuomotor task, which is explained by the fact that for this task the model can achieve near-zero  
 235 error, thus learning signals provided by the cerebellum are no longer needed. However, for all the online tasks we  
 236 observe that inactivating the cerebellum even at later stages damages learning. In these more realistic tasks the  
 237 cortical network still relies on the feedback provided by cerebellum as it does not fully learn the task. Our results  
 238 indicate that lesion studies should reveal a task-dependent nonlinear role of the cerebellum on cerebral learning.

239 Next, we assess the impact of disrupting cerebellar learning by modelling a complete lesion of our inferior olive-  
 240 like error module (Methods). This manipulation effectively stops cerebellar learning, thereby impacting on the ability  
 241 of the cerebellum to provide informative feedback learning signals to the cerebral network which may prevent the  
 242 cerebral network from learning. For all of the tasks that we model, inactivating cerebellar learning has a strong impact  
 243 throughout training, making the model return to naive performance (Fig. 7c,d). Thus, simulated "inferior olive" lesions  
 244 predicts that if the cerebellum cannot learn it would result in a stronger negative impact in task learning than ablating  
 245 the cerebellum itself. This further suggests that it is critical for the cerebellum to learn rapidly to be able to provide  
 246 informative predictions.

## 247 Cerebro-cerebellar model facilitates learning in a visual-language task

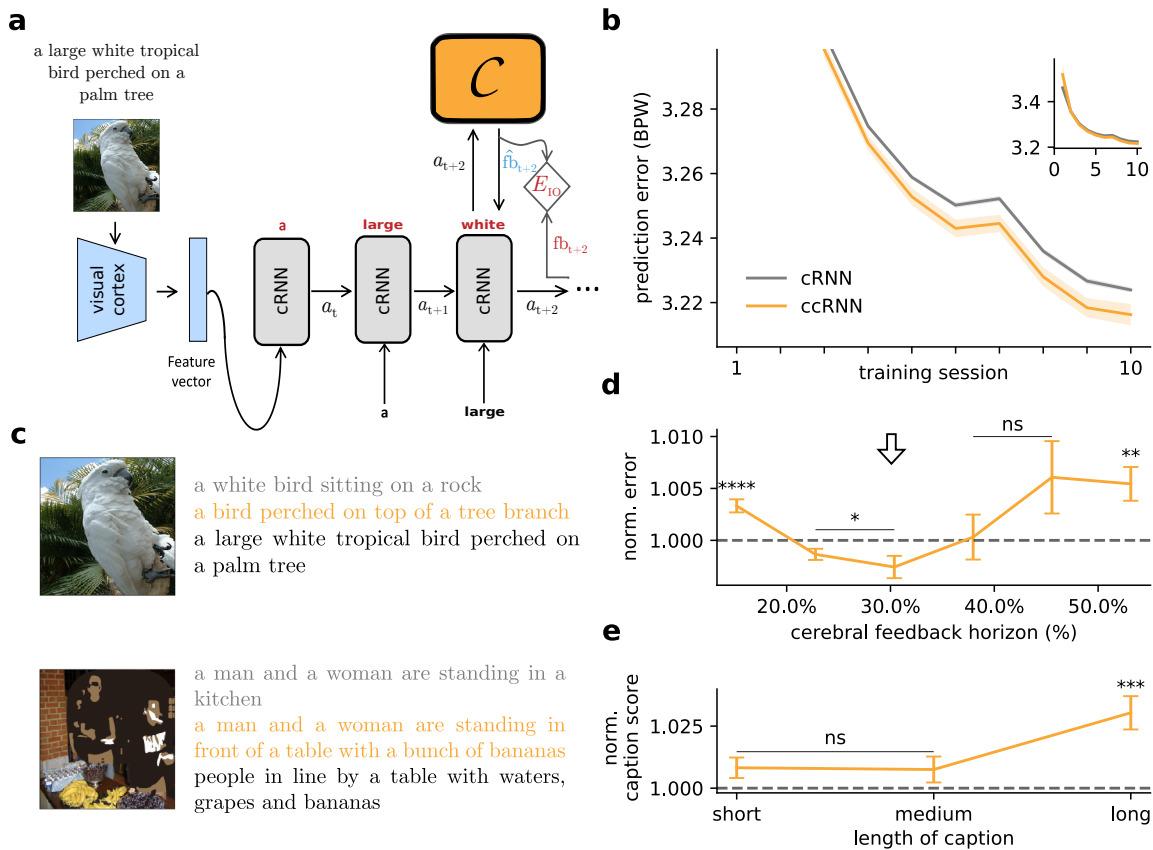

**Figure 8. Cerebro-cerebellar model facilitates learning in a visual-language task.** (a) Schematic of the model used in a visual-language task. The image is first processed by a (pretrained) convolutional neural network modelling the visual cortex. The resulting feature vector is then provided to the cerebral RNN which is trained to predict the next word given the previous words of a provided "gold standard" caption to the image. The cerebellum module  $C$  is only applied to the cRNN. (b) Learning curves in bits per word (BPW), lower values indicate better understanding of the language, on validation set for cerebral feedback horizon of four timesteps (inset shows complete learning curve). (c) Two example images from the validation set with corresponding model captions and gold standard captions (black). (d) Normalised model performance across different degrees of feedback horizon in the cerebral network ( $p=0.891$  (40%),  $p=0.116$  (45%).) (e) Normalised caption score (Methods) as a function of caption length ( $p=0.075$  (short),  $p=0.189$  (medium)). \*:  $p<0.05$ , \*\*:  $p<0.01$ , \*\*\*:  $p<0.001$ , \*\*\*\*:  $p<0.0001$ . Error bars represent mean  $\pm$  SEM across 10 different initial conditions.

248 Our framework does not only apply to sensorimotor tasks, but should generalise to virtually any task within the

249 grasp of current neural networks models. To test the generability of our model and inspired by cognitive tasks in  
250 which cerebellar patients have shown deficits<sup>49</sup> we test our models in a caption generation task. In this task the  
251 network needs to generate a textual description for a given image. All models have two components: a pretrained  
252 convolutional neural network (CNN) to extract a lower dimensional representation of the image, and a cRNN or ccRNN  
253 on top which is trained to map the low dimensional visual input to captions that describe the image. (Fig. 8a).

254 We use a standard machine learning dataset<sup>50</sup> and the networks are trained to predict the next word (Methods).  
255 In contrast to the previous tasks here we use a form of unsupervised learning, in which the prediction error module  
256 only uses the data itself (i.e. words) to generate teaching signals (Supplementary). We find that ccRNN models can  
257 exhibit faster learning (Fig. 8b) (Fig. 8d) and better generalisation<sup>51</sup> (Fig. S9) when in the presence of short cerebral  
258 feedback horizons ( $\leq 40\%$ ). All models produce reasonable captions for images unseen during training, but ccRNN  
259 models tend to produce captions that better capture the context and semantics of the task (Figs. 8c, S10), consistent  
260 with cerebellar deficits<sup>14</sup>.

261 Finally, we use a language metric (SPICE<sup>52</sup>) to measure the quality of the generated captions. These results show  
262 that the ccRNN generates richer captions (Fig. 8e) and that it is particularly beneficial for longer captions. This suggests  
263 that ccRNN is able to learn richer visuo-language contextual information.

## 264 Discussion

265 Inspired by recent deep learning developments, here we have introduced a systems-level computational model in  
266 which cerebellar networks predict cerebral feedback (Fig. 1). In this scheme cerebro-cerebellar loops decouple cere-  
267 bral cortical networks from future feedback signals. We show that the ccRNN model accelerates learning and im-  
268 proves task behaviour in a range of sensorimotor and cognitive tasks (Figs. 2, 3 and 8). Our results are consistent  
269 with observed motor and cognitive deficits in cerebellar patients. Our model makes a number of predictions in terms  
270 of (1) task properties (Figs. 4 and 5), (2) cerebro-cerebellar representations and coupling (Figs. 2 and 6), and (3) the  
271 differential role of the cerebellum and the inferior olive throughout learning (Fig. 7).

272 Experimental studies have shown that incomplete or delayed external sensory feedback is important for learn-  
273 ing<sup>45,53,54</sup>. Our model proposes that the cerebellum plays an important role in facilitating motor learning when in the  
274 presence of incomplete or delayed feedback. Furthermore, our work suggests that cerebro-cerebellar networks are  
275 ideally placed to facilitate learning when task feedback is presented intermittently, at medium frequencies with re-  
276 spect to task sequence. Similarly, our results suggest that cerebellum-dependent dysmetria should be more prevalent  
277 for tasks with intermediate to long inter-feedback intervals. Although there is a wide range of studies investigating  
278 the role of external sensory feedback in learning<sup>53,55</sup> and the precise timing of feedback is known to be important for  
279 cerebellar function<sup>10,56</sup>, it remains to be tested what are the optimal properties of task feedback for learning. Taken  
280 together, we suggest cerebellar-mediated feedback predictions to be particularly important for temporally challeng-  
281 ing tasks with sparse feedback.

282 Our representational analyses demonstrate that the cerebellum develops task-specific representations. Recent  
283 fMRI studies have observed that different regions of the cerebellum encodes task-specific representations for dif-  
284 ferent domains<sup>23,57</sup>. Similarly, our model predicts the need for different cerebellar modules to provide feedback  
285 estimations to the cerebral cortex for specific task domains. We have also studied the level of coupling between cere-  
286 bellar and cerebral neural activity. Our results demonstrate an initial rise in correlations which coincides with steep  
287 periods of learning followed by a general decay in the coupling during the remaining periods of learning. This general  
288 decay in coupling is also reflected in our simulated cerebellar lesions which echo the existing literature in that after  
289 a task is consolidated in the cerebrum it becomes less cerebellar-dependent<sup>58,59</sup>.

290 In line with previous theoretical accounts<sup>6,7,9</sup> we suggest that the cerebellar error function is computed by the  
291 *inferior olive*, which drives learning in the cerebellum via the climbing fibres. This cerebellar error function is a com-  
292 bination of true sensory feedback and self-predicted (bootstrapped) error signals (Fig. 1b), which is analogous to the  
293 bootstrapping principles commonly used in reinforcement learning<sup>60</sup>. The use of self-predictions in the cerebellum  
294 suggests the existence of different forms of feedback to the inferior olive from potentially multiple cerebellar mod-  
295 ules, consistent with cerebellar-inferior olive connectivity<sup>61</sup>. Moreover, when ablating the inferior olive lesions we  
296 show that task performance become severely impaired. This is due to the cerebellum being unable to learn, thereby  
297 providing outdated feedback signals back to the cerebral cortex. These results suggest non-trivial consequences of  
298 lesions for cerebro-cerebellar interactions.

299 While our model is consistent with experimental observations, there are several biological features that we have  
300 not considered. In particular, experimental studies suggest that the cerebellum can influence cerebral learning pro-  
301 cesses via its projections to the thalamus<sup>62-65</sup>. This is in line with ccRNN where the cerebellum predicts feedback  
302 signals that contribute directly to cerebral learning. However, we have assumed direct long-range projections with  
303 the cerebral cortex whereas in biology these projections are mediated through the thalamus and pons. It is possi-  
304 ble that both structures may provide bottlenecks that filter out non-relevant information, such as poor estimated  
305 feedback (Figs. 2d, 3d) that would impair cerebral learning. In addition, cerebellar-thalamic-cerebral projections are  
306 known to target distal dendrites of pyramidal cells<sup>66,67</sup>, which have been proposed to encode feedback error signals  
307 by a number of models as used by deep learning models<sup>68,69</sup>. These dendritic-encoded error signals are akin to the  
308 gradient descent errors that we use to model cortical feedback signals. In future work it would be of interest to  
309 combine our work with these biologically plausible gradient descent models.

310 Throughout this paper we have assumed the existence of cerebral prediction error modules, which compare the  
311 output of a given cerebral area with a desired task output to generate a feedback teaching signal for the cerebral cor-  
312 tex. There is evidence of prediction errors across different brain areas, for example sensorimotor prediction errors  
313 in the neocortex<sup>70,71</sup> or reward prediction errors in the VTA<sup>1,72</sup>. For simplicity, here we have focused on supervised  
314 (Figs. 2,3) and unsupervised (Fig. 8) prediction errors, but these can in principle be readily replaced by reward-based  
315 prediction errors<sup>1,73</sup>. This would predict reward-specific encodings in the cerebellum as observed recently<sup>74-76</sup>. In-  
316 deed, our model is of particular relevance to reinforcement learning due to prevalence of sparse and delayed rewards  
317 (Fig. 4).

318 Finally, our model shares common features with classical internal models of the cerebellum<sup>(6,7; Table S1)</sup>. In  
319 the forward model of sensorimotor control, the cerebellum receives an efferent copy of the motor commands and  
320 the respective external sensory feedback<sup>8,77</sup>. With these two input streams the forward model learns to predict  
321 the sensory consequences of motor commands. We and others have argued that a similar predictive model can in  
322 principle be applied to higher order brain regions such as the prefrontal cortex and the temporo-parietal cortex which  
323 are involved in planning of cognitive behaviour and decision making<sup>16,17,24,26</sup> (Fig. 1a). In line with forward models the  
324 cerebellar module of ccRNN receives an efferent copy of the cerebral neural activity and cerebral feedback. Given  
325 these signals the cerebellum learns to predict future cerebral feedback.

326 Overall, our work offers a novel theoretical framework with which to study cerebro-cerebellar interactions, being  
327 consistent with experimental observations while making a large number of testable predictions across multiple levels  
328 of interrogation.

## 329 **Acknowledgements**

330 We would like to thank the Neural & Machine Learning group, Paul Anastasiades, Paul Dodson, Conor Houghton,  
331 Laurence Aitchison, Cian O'Donnell, James M. Shine, Max Jaderberg, Nadia Cerminara and Jasmine Pickford for useful  
332 feedback. We would also like to thank Samia Mohinta and Milton Llera Montero for help with model analysis and  
333 training. JP was funded by a EPSRC Doctoral Training Partnership award (EP/R513179/1) and EB by the Wellcome  
334 Trust (220101/Z/20/Z). This work made use of the HPC system Blue Pebble at the University of Bristol, UK.

## References

- 335 [1] W. Schultz, P. Dayan, and P. R. Montague. A neural substrate of prediction and reward. *Science*, 275(5306):1593–1599, 1997.
- 336
- 337 [2] C. D. B. Luft. Learning from feedback: The neural mechanisms of feedback processing facilitating better performance. *Behavioural brain research*, 261:356–368, 2014.
- 338
- 339 [3] M. H. Herzog and M. Fahle. The role of feedback in learning a vernier discrimination task. *Vision research*, 37(15):2133–2141,
- 340 1997.
- 341 [4] D. M. Wolpert and Z. Ghahramani. Computational principles of movement neuroscience. *Nature neuroscience*, 3(11):1212–1217,
- 342 2000.
- 343 [5] D. M. Wolpert, R. C. Miall, and M. Kawato. Internal models in the cerebellum. *Trends in cognitive sciences*, 2(9):338–347, 1998.
- 344 [6] D. Marr. A theory of cerebellar cortex. *The Journal of Physiology*, 202(2):437–470, jun 1969. ISSN 00223751. doi: 10.1113/jphysiol.
- 345 1969.sp008820. URL <http://doi.wiley.com/10.1113/jphysiol.1969.sp008820>.
- 346 [7] J. S. Albus. A theory of cerebellar function. *Mathematical Biosciences*, 10(1):25–61, 1971. ISSN 0025-5564. doi: 10.1016/
- 347 0025-5564(71)90051-4.
- 348 [8] R. C. Miall, D. J. Weir, D. M. Wolpert, and J. F. Stein. Is the cerebellum a smith predictor? *Journal of Motor Behavior*, 25(3):203–216,
- 349 1993. ISSN 19401027. doi: 10.1080/00222895.1993.9942050.
- 350 [9] J. L. Raymond and J. F. Medina. Computational principles of supervised learning in the cerebellum. *Annual review of neuroscience*,
- 351 41:233–253, 2018.
- 352 [10] N. L. Cerminara, R. Apps, and D. E. Marple-Horvat. An internal model of a moving visual target in the lateral cerebellum. *The*
- 353 *Journal of physiology*, 587(2):429–442, 2009.
- 354 [11] J. N. Sanes, B. Dimitrov, and M. Hallett. Motor learning in patients with cerebellar dysfunction. *Brain*, 113(1):103–120, 1990.
- 355 [12] J. A. Fiez, S. E. Petersen, M. K. Cheney, and M. E. Raichle. Impaired non-motor learning and error detection associated with
- 356 cerebellar damage: A single case study. *Brain*, 115(1):155–178, 1992.
- 357 [13] N. Rahmati, C. B. Owens, L. W. Bosman, J. K. Spanke, S. Lindeman, W. Gong, J.-W. Potters, V. Romano, K. Voges, L. Moscato,
- 358 et al. Cerebellar potentiation and learning a whisker-based object localization task with a time response window. *Journal of*
- 359 *Neuroscience*, 34(5):1949–1962, 2014.
- 360 [14] X. Guell, F. Hoche, and J. D. Schmahmann. Metalinguistic Deficits in Patients with Cerebellar Dysfunction: Empirical Support for
- 361 the Dysmetria of Thought Theory. *Cerebellum*, 14(1):50–58, December 2015. ISSN 14734230. doi: 10.1007/s12311-014-0630-z.
- 362 [15] T. M. Locke, M. E. Soden, S. M. Miller, A. Hunker, C. Knakal, J. A. Licholai, K. S. Dhillon, C. D. Keene, L. S. Zweifel, and E. S. Carlson.
- 363 Dopamine D1 Receptor-Positive Neurons in the Lateral Nucleus of the Cerebellum Contribute to Cognitive Behavior. *Biological*
- 364 *Psychiatry*, 84(6):401–412, 2018. ISSN 18732402. doi: 10.1016/j.biopsych.2018.01.019.
- 365 [16] J. A. Brissenden and D. C. Somers. Cortico-cerebellar networks for visual attention and working memory. *Current Opinion in*
- 366 *Psychology*, 2019. ISSN 2352250X. doi: 10.1016/j.copsyc.2019.05.003.
- 367 [17] J. D. Schmahmann, X. Guell, C. J. Stoodley, and M. A. Halko. The Theory and Neuroscience of Cerebellar Cognition. *Annual*
- 368 *Review of Neuroscience*, 42(1):337–364, July 2019. ISSN 0147-006X. doi: 10.1146/annurev-neuro-070918-050258.
- 369 [18] X. Guell, J. D. Gabrieli, and J. D. Schmahmann. Triple representation of language, working memory, social and emotion pro-
- 370 cessing in the cerebellum: Convergent evidence from task and seed-based resting-state fMRI analyses in a single large cohort.
- 371 *NeuroImage*, 172:437–449, May 2018. ISSN 10959572. doi: 10.1016/j.neuroimage.2018.01.082.
- 372 [19] B. Deverett, M. Kislin, D. W. Tank, S. Samuel, and H. Wang. Cerebellar disruption impairs working memory during evidence
- 373 accumulation. *bioRxiv*, page 521849, 2019.
- 374 [20] S. C. Baker, R. D. Rogers, A. M. Owen, C. D. Frith, R. J. Dolan, R. S. J. Frackowiak, and T. W. Robbins. Neural systems engaged by
- 375 planning: a PET study of the Tower of London task. *Neuropsychologia*, 34(6):515–526, 1996.
- 376 [21] R. M. Kelly and P. L. Strick. Cerebellar loops with motor cortex and prefrontal cortex of a nonhuman primate. *Journal of*
- 377 *neuroscience*, 23(23):8432–8444, 2003.
- 378 [22] P. L. Strick, R. P. Dum, and J. A. Fiez. Cerebellum and nonmotor function. *Annual review of neuroscience*, 32:413–434, 2009.
- 379 [23] M. King, C. R. Hernandez-Castillo, R. A. Poldrack, R. B. Ivry, and J. Diedrichsen. Functional boundaries in the human cerebellum
- 380 revealed by a multi-domain task battery. *Nature Neuroscience*, 22(8):1371–1378, August 2019.

- 381 [24] M. Ito. Control of mental activities by internal models in the cerebellum. *Nature Reviews Neuroscience*, 9(4):304–313, apr 2008.  
382 ISSN 1471-003X. doi: 10.1038/nrn2332. URL [www.nature.com/reviews/neuro](http://www.nature.com/reviews/neuro)<http://www.nature.com/articles/nrn2332>.
- 383 [25] M. J. Wagner, T. H. Kim, J. Kadmon, N. D. Nguyen, S. Ganguli, M. J. Schnitzer, and L. Luo. Shared Cortex-Cerebellum Dynamics  
384 in the Execution and Learning of a Motor Task. *Cell*, 177(3):669–682.e24, 2019. ISSN 10974172. doi: 10.1016/j.cell.2019.02.019.  
385 URL <https://doi.org/10.1016/j.cell.2019.02.019>.
- 386 [26] M. J. Wagner and L. Luo. Neocortex–Cerebellum Circuits for Cognitive Processing. *Trends in Neurosciences*, 43(1):42–54, 2020.  
387 ISSN 1878108X. doi: 10.1016/j.tins.2019.11.002. URL <https://doi.org/10.1016/j.tins.2019.11.002>.
- 388 [27] V. Mante, D. Sussillo, K. V. Shenoy, and W. T. Newsome. Context-dependent computation by recurrent dynamics in prefrontal  
389 cortex. *nature*, 503(7474):78–84, 2013.
- 390 [28] H. F. Song, G. R. Yang, and X.-J. Wang. Training excitatory-inhibitory recurrent neural networks for cognitive tasks: a simple and  
391 flexible framework. *PLoS computational biology*, 12(2):e1004792, 2016.
- 392 [29] K. Rajan, C. D. Harvey, and D. W. Tank. Recurrent network models of sequence generation and memory. *Neuron*, 90(1):128–142,  
393 2016.
- 394 [30] R. Laje and D. V. Buonomano. Robust timing and motor patterns by taming chaos in recurrent neural networks. *Nature*  
395 *neuroscience*, 16(7):925–933, 2013.
- 396 [31] P. A. Butcher, R. B. Ivry, S. H. Kuo, D. Rydz, J. W. Krakauer, and J. A. Taylor. The cerebellum does more than sensory prediction  
397 error-based learning in sensorimotor adaptation tasks. *Journal of Neurophysiology*, 118(3):1622–1636, 2017. ISSN 15221598.  
398 doi: 10.1152/jn.00451.2017.
- 399 [32] A. Nashef, O. Cohen, R. Harel, Z. Israel, and Y. Prut. Reversible Block of Cerebellar Outflow Reveals Cortical Circuitry for Motor  
400 Coordination. *Cell Reports*, 27(9):2608–2619.e4, 2019. ISSN 22111247. doi: 10.1016/j.celrep.2019.04.100. URL <https://doi.org/10.1016/j.celrep.2019.04.100>.
- 402 [33] M. Jaderberg, W. M. Czarnecki, S. Osindero, O. Vinyals, A. Graves, D. Silver, and K. Kavukcuoglu. Decoupled neural interfaces  
403 using synthetic gradients. In *Proceedings of the 34th International Conference on Machine Learning-Volume 70*, pages 1627–1635.  
404 JMLR. org, 2017.
- 405 [34] S. Herculano-Houzel. The human brain in numbers: a linearly scaled-up primate brain. *Frontiers in Human Neuroscience*, 3:31,  
406 2009. ISSN 1662-5161. doi: 10.3389/neuro.09.031.2009. URL <https://www.frontiersin.org/article/10.3389/neuro.09.031.2009>.
- 407 [35] J. Diedrichsen, M. King, C. Hernandez-Castillo, M. Sereno, and R. B. Ivry. Universal transform or multiple functionality? under-  
408 standing the contribution of the human cerebellum across task domains. *Neuron*, 102(5):918–928, 2019.
- 409 [36] Y.-w. Tseng, J. Diedrichsen, J. W. Krakauer, R. Shadmehr, and A. J. Bastian. Sensory prediction errors drive cerebellum-dependent  
410 adaptation of reaching. *Journal of neurophysiology*, 98(1):54–62, 2007.
- 411 [37] M. L. Streng, L. S. Popa, and T. J. Ebner. Modulation of sensory prediction error in purkinje cells during visual feedback manip-  
412 ulations. *Nature communications*, 9(1):1–12, 2018.
- 413 [38] J. Hore, B. Wild, and H. Diener. Cerebellar dysmetria at the elbow, wrist, and fingers. *Journal of neurophysiology*, 65(3):563–571,  
414 1991.
- 415 [39] S. E. Criscimagna-Hemminger, A. J. Bastian, and R. Shadmehr. Size of error affects cerebellar contributions to motor learning.  
416 *Journal of neurophysiology*, 103(4):2275–2284, 2010.
- 417 [40] Y. LeCun, C. Cortes, and C. Burges. Mnist handwritten digit database, 2010.
- 418 [41] J. D. Schmahmann. Disorders of the cerebellum: ataxia, dysmetria of thought, and the cerebellar cognitive affective syndrome.  
419 *The Journal of neuropsychiatry and clinical neurosciences*, 16(3):367–378, 2004.
- 420 [42] Z. Gao, C. Davis, A. M. Thomas, M. N. Economo, A. M. Abrego, K. Svoboda, C. I. De Zeeuw, and N. Li. A cortico-cerebellar loop  
421 for motor planning. *Nature*, 563(7729):113–116, 2018.
- 422 [43] M. King, C. R. Hernandez-Castillo, R. A. Poldrack, R. B. Ivry, and J. Diedrichsen. Functional boundaries in the human cerebellum  
423 revealed by a multi-domain task battery. *Nature neuroscience*, 22:1371–1378, 2019.
- 424 [44] S. Kitazawa, T. Kohno, and T. Uka. Effects of delayed visual information on the rate and amount of prism adaptation in the  
425 human. *Journal of Neuroscience*, 15(11):7644–7652, 1995.
- 426 [45] T. Ikegami, M. Hirashima, R. Osu, and D. Nozaki. Intermittent visual feedback can boost motor learning of rhythmic movements:  
427 evidence for error feedback beyond cycles. *Journal of Neuroscience*, 32(2):653–657, 2012.

- 428 [46] N. Levy, A. Pressman, F. A. Mussa-Ivaldi, and A. Karniel. Adaptation to delayed force perturbations in reaching movements.  
429 *PLoS one*, 5(8):e12128, 2010.
- 430 [47] M. Synofzik, A. Lindner, and P. Thier. The Cerebellum Updates Predictions about the Visual Consequences of One's Behavior.  
431 *Current Biology*, 18(11):814–818, 2008. ISSN 09609822. doi: 10.1016/j.cub.2008.04.071.
- 432 [48] C. Batcho, M. Gagné, L. Bouyer, J. Roy, and C. Mercier. Impact of online visual feedback on motor acquisition and retention  
433 when learning to reach in a force field. *Neuroscience*, 337:267–275, 2016.
- 434 [49] A. L. Gebhart, S. E. Petersen, and W. T. Thach. Role of the posterolateral cerebellum in language. *Annals of the New York Academy  
435 of Sciences*, 978(1):318–333, 2002.
- 436 [50] O. Russakovsky, J. Deng, H. Su, J. Krause, S. Satheesh, S. Ma, Z. Huang, A. Karpathy, A. Khosla, M. Bernstein, A. C. Berg, and  
437 L. Fei-Fei. ImageNet Large Scale Visual Recognition Challenge. *International Journal of Computer Vision (IJCV)*, 115(3):211–252,  
438 2015. doi: 10.1007/s11263-015-0816-y.
- 439 [51] W. M. Czarnecki, G. Swirszcz, M. Jaderberg, S. Osindero, O. Vinyals, and K. Kavukcuoglu. Understanding synthetic gradients and  
440 decoupled neural interfaces. In *Proceedings of the 34th International Conference on Machine Learning-Volume 70*, pages 904–912.  
441 JMLR. org, 2017.
- 442 [52] P. Anderson, B. Fernando, M. Johnson, and S. Gould. Spice: Semantic propositional image caption evaluation. In *European  
443 Conference on Computer Vision*, pages 382–398. Springer, 2016.
- 444 [53] T. Honda, M. Hirashima, and D. Nozaki. Adaptation to visual feedback delay influences visuomotor learning. *PLoS one*, 7(5):  
445 e37900, 2012.
- 446 [54] S. H. Park, A. Casamento-Moran, M. L. Singer, A. E. Ernster, B. Yacoubi, I. A. Humbert, and E. A. Christou. Integration of visual  
447 feedback and motor learning: corticospinal vs. corticobulbar pathway. *Human movement science*, 58:88–96, 2018.
- 448 [55] A. J. M. Foulkes and R. C. Miall. Adaptation to visual feedback delays in a human manual tracking task. *Experimental brain  
449 research*, 131(1):101–110, 2000.
- 450 [56] H. Beppu, M. Suda, and R. Tanaka. Analysis of cerebellar motor disorders by visually guided elbow tracking movement. *Brain*,  
451 107(3):787–809, 1984.
- 452 [57] R. Ashida, N. L. Cermignara, R. J. Edwards, R. Apps, and J. C. W. Brooks. Sensorimotor, language, and working memory represen-  
453 tation within the human cerebellum. *Human Brain Mapping*, 40(16):4732–4747, July 2019.
- 454 [58] J. Doyon, V. Penhune, and L. G. Ungerleider. Distinct contribution of the cortico-striatal and cortico-cerebellar systems to motor  
455 skill learning. *Neuropsychologia*, 41(3):252–262, 2003.
- 456 [59] E. Galliano, Z. Gao, M. Schonewille, B. Todorov, E. Simons, A. S. Pop, E. D'Angelo, A. M. J. M. Van Den Maagdenberg, F. E.  
457 Hoebeek, and C. I. De Zeeuw. Silencing the majority of cerebellar granule cells uncovers their essential role in motor learning  
458 and consolidation. *Cell reports*, 3(4):1239–1251, 2013.
- 459 [60] R. S. Sutton and A. G. Barto. *Reinforcement learning: An introduction*. MIT press, 2018.
- 460 [61] F. Bengtsson and G. Hesslow. Cerebellar control of the inferior olive. *The cerebellum*, 5(1):7–14, 2006.
- 461 [62] S. E. Hua and J. C. Houk. Cerebellar guidance of premotor network development and sensorimotor learning. *Learning & Memory*,  
462 4(1):63–76, 1997.
- 463 [63] V. B. Penhune and J. Doyon. Cerebellum and m1 interaction during early learning of timed motor sequences. *Neuroimage*, 26  
464 (3):801–812, 2005.
- 465 [64] A. Kishore, S. Meunier, and T. Popa. Cerebellar influence on motor cortex plasticity: behavioral implications for parkinson's  
466 disease. *Frontiers in neurology*, 5:68, 2014.
- 467 [65] Y. H. Tanaka, Y. R. Tanaka, M. Kondo, S.-I. Terada, Y. Kawaguchi, and M. Matsuzaki. Thalamocortical axonal activity in motor  
468 cortex exhibits layer-specific dynamics during motor learning. *Neuron*, 100(1):244–258, 2018.
- 469 [66] K. Guo, N. Yamawaki, K. Svoboda, and G. M. Shepherd. Anterolateral motor cortex connects with a medial subdivision of  
470 ventromedial thalamus through cell type-specific circuits, forming an excitatory thalamo-cortico-thalamic loop via layer 1 apical  
471 tuft dendrites of layer 5b pyramidal tract type neurons. *Journal of Neuroscience*, 38(41):8787–8797, 2018.
- 472 [67] P. G. Anastasiades, D. P. Collins, and A. G. Carter. Mediodorsal and ventromedial thalamus engage distinct l1 circuits in the  
473 prefrontal cortex. *Neuron*, 109(2):314–330, 2021.



- 474 [68] J. Sacramento, R. P. Costa, Y. Bengio, and W. Senn. Dendritic cortical microcircuits approximate the backpropagation algorithm.  
475 In *Advances in Neural Information Processing Systems*, pages 8721–8732, 2018.
- 476 [69] A. Payeur, J. Guerguiev, F. Zenke, B. A. Richards, and R. Naud. Burst-dependent synaptic plasticity can coordinate learning in  
477 hierarchical circuits. *Nature neuroscience*, pages 1–10, 2021.
- 478 [70] A. Attinger, B. Wang, and G. B. Keller. Visuomotor Coupling Shapes the Functional Development of Mouse Visual Cortex. *Cell*,  
479 169(7):1291–1302.e14, June 2017. ISSN 0092-8674. doi: 10.1016/j.cell.2017.05.023.
- 480 [71] R. Jordan and G. B. Keller. Opposing Influence of Top-down and Bottom-up Input on Excitatory Layer 2/3 Neurons in Mouse  
481 Primary Visual Cortex. *Neuron*, 108(6):1194–1206.e5, December 2020. ISSN 0896-6273. doi: 10.1016/j.neuron.2020.09.024.
- 482 [72] R. Keiflin and P. H. Janak. Dopamine prediction errors in reward learning and addiction: From theory to neural circuitry. *Neuron*,  
483 88(2):247–263, 2015.
- 484 [73] V. Mnih, K. Kavukcuoglu, D. Silver, A. A. Rusu, J. Veness, M. G. Bellemare, A. Graves, M. Riedmiller, A. K. Fidjeland, G. Ostrovski,  
485 S. Petersen, C. Beattie, A. Sadik, I. Antonoglou, H. King, D. Kumaran, D. Wierstra, S. Legg, and D. Hassabis. Human-level control  
486 through deep reinforcement learning. *Nature*, 518(7540):529–533, February 2015. ISSN 1476-4687. doi: 10.1038/nature14236.
- 487 [74] M. J. Wagner, T. H. Kim, J. Savall, M. J. Schnitzer, and L. Luo. Cerebellar granule cells encode the expectation of reward. *Nature*,  
488 544(7648):96–100, 2017.
- 489 [75] I. Carta, C. H. Chen, A. L. Schott, S. Dorizan, and K. Khodakhah. Cerebellar modulation of the reward circuitry and social behavior.  
490 *Science*, 363(6424), 2019.
- 491 [76] N. Sendhilnathan, A. E. Ipata, and M. E. Goldberg. Neural correlates of reinforcement learning in mid-lateral cerebellum. *Neuron*,  
492 2020.
- 493 [77] M. Ito. Neurophysiological aspects of the cerebellar motor control system. *International journal of neurology*, 7(2):162–176,  
494 1970. ISSN 0020-7446. URL <http://europepmc.org/abstract/MED/5499516>.
- 495 [78] S. Hochreiter and J. Schmidhuber. Long short-term memory. *Neural computation*, 9(8):1735–1780, 1997.
- 496 [79] R. P. Costa, I. A. Assael, B. Shillingford, N. de Freitas, and T. Vogels. Cortical microcircuits as gated-recurrent neural networks.  
497 In *Advances in neural information processing systems*, pages 272–283, 2017.
- 498 [80] H. Tanaka, T. Ishikawa, J. Lee, and S. Kakei. The Cerebro-Cerebellum as a Locus of Forward Model: A Review. *Frontiers in Systems  
499 Neuroscience*, 14:19, 2020. ISSN 1662-5137. doi: 10.3389/fnsys.2020.00019. URL [https://www.frontiersin.org/article/10.3389/  
500 fnsys.2020.00019](https://www.frontiersin.org/article/10.3389/fnsys.2020.00019).
- 501 [81] D. P. Kingma and J. Ba. Adam: A method for stochastic optimization. *arXiv preprint arXiv:1412.6980*, 2014.
- 502 [82] K. He, X. Zhang, S. Ren, and J. Sun. Delving deep into rectifiers: Surpassing human-level performance on imagenet classification.  
503 In *Proceedings of the IEEE international conference on computer vision*, pages 1026–1034, 2015.
- 504 [83] O. Vinyals, A. Toshev, S. Bengio, and D. Erhan. Show and tell: A neural image caption generator. In *Proceedings of the IEEE  
505 conference on computer vision and pattern recognition*, pages 3156–3164, 2015.
- 506 [84] K. He, X. Zhang, S. Ren, and J. Sun. Deep residual learning for image recognition. In *Proceedings of the IEEE conference on  
507 computer vision and pattern recognition*, pages 770–778, 2016.
- 508 [85] N. Srivastava, G. Hinton, A. Krizhevsky, I. Sutskever, and R. Salakhutdinov. Dropout: a simple way to prevent neural networks  
509 from overfitting. *The journal of machine learning research*, 15(1):1929–1958, 2014.
- 510 [86] D. Kobak, W. Brendel, C. Constantinidis, C. E. Feierstein, A. Kepecs, Z. F. Mainen, X.-L. Qi, R. Romo, N. Uchida, and C. K. Machens.  
511 Demixed principal component analysis of neural population data. *eLife*, 5, 2016. ISSN 2050-084X. doi: 10.7554/eLife.10989.

## 512 Methods

513 In all our experiments we model a cerebral area  $A$  as a long short-term memory recurrent neural network (LSTM)<sup>78</sup>  
 514 with parameters  $\theta$  which has recently been mapped onto cortical microcircuits<sup>79</sup>. A (trained) linear readout is attached  
 515 to the LSTM output states which provides the final model output to which a supervised error module  $E^{\text{task}}$ , which  
 516 below we refer to as  $E$ .

517 In the cerebro-cerebellar RNN model (ccRNN) we attach a feedforward cerebellar module  $C$  with independent  
 518 parameters  $\Psi$  to the RNN with reciprocal connections (Fig. 1). The cerebellar module is equivalent to the “synthesiser”  
 519 as used by Jaderberg et al.<sup>33</sup> in the backward case. That is, the cerebellar module receives a copy of the RNN activity  
 520  $a_t$  (both cell and output LSTM states) and sends back a prediction of the future feedback (or error gradients) with  
 521 respect to that activity,  $C(a_t)$ .

522 To generate the desired cerebral temporal feedback (error gradients) we use backpropagation through time  
 523 (BPTT). To highlight the link between BPTT-derived feedback and the cerebellar predicted feedback we start out from  
 524 first principles closely following Jaderberg et al.<sup>33</sup>. BPTT is used as the standard solution for updating parameters  $\theta$  in  
 525 deep learning. In an ideal world one would have access to all error signals within a task of length  $T$ ,  $\sum_t^T E_t$ , and derive  
 526 the resulting parameter updates as  $\theta \leftarrow \theta - \alpha \Delta\theta$  where  $\Delta\theta = \sum_{t'=t}^T \frac{\partial E_{t'}}{\partial \theta}$ , but this is impractical as it would require  
 527 information about all possible future error signals. Instead, in practice BPTT over a time horizon  $K$  is commonly used  
 528 (Fig. 1)

$$\begin{aligned} \sum_{t'=t}^T \frac{\partial E_{t'}}{\partial \theta} &= \left( \sum_{t'=t}^K \frac{\partial E_{t'}}{\partial a_t} \right) \frac{\partial a_t}{\partial \theta} + \left( \sum_{t'=K+1}^T \frac{\partial E_{t'}}{\partial a_K} \right) \frac{\partial a_K}{\partial \theta} \\ \sum_{t'=t}^T \frac{\partial E_{t'}}{\partial \theta} &\approx \left( \underbrace{fb_{t'}}_{\text{cerebral feedback}} + \underbrace{\hat{fb}_{t'>K}}_{\text{cerebellar feedback}} \frac{\partial a_K}{\partial a_t} \right) \frac{\partial a_t}{\partial \theta} \\ \Delta\theta &\approx \left( \underbrace{fb_t}_{\text{cerebral feedback}} + \underbrace{C(a_K)}_{\text{cerebellar feedback}} \frac{\partial a_K}{\partial a_t} \right) \frac{\partial a_t}{\partial \theta} \end{aligned} \quad (1)$$

529 where  $fb_{t'}$  denotes the cerebral feedback and  $C(a_K)$  cerebellar predictions of *future feedback* and  $\frac{\partial a_K}{\partial a_t}$  represents the  
 530 temporal changes in cerebral activity. These equations help make clear the distinction between **cerebral feedback**  
 531 modelling feedback within current horizon  $K$  and **cerebellar feedback** predicting future horizons. Note that if we set  
 532  $C(a_t) = 0$  then we simply have standard truncated-BPTT over a time horizon  $K$ , as commonly used in deep learning.

533 A key consequence of the cerebellum predicting future feedback is that *strong* or *long* feedback signals (i.e.  $T \gg 0$ )  
 534 are no longer necessary, thus decoupling learning in the cerebral network from future feedback signals. For this  
 535 reason we focus on weak forms of BPTT with relatively small temporal horizons, in which we model only  $K$  time steps  
 536 of feedback into the past from an error signal  $E$ , this is known as truncated BPTT. In our experiments the size of  $K$   
 537 - which we report as a percentage of the task length (cerebral temporal gradient) - varies but is generally small. For  
 538 example, for the simple line drawing task we used a one-step BPTT (i.e.  $K = 1$ ; Fig. 2). Note in the main text as we  
 539 focus on describing a simpler case of  $K = 1$  (as used in the simple line drawing task) we use  $C(a_t)$  to refer to the  
 540 cerebellar feedback prediction from the end of the current horizon, i.e.  $C(a_t) = C(a_K) \frac{\partial a_K}{\partial a_t}$ .

## 541 Cerebellar learning

542 The cerebellar parameters  $\Psi$  are themselves learnt but to optimise a distinct, specialised error  $E^{IO}$  which we posit  
 543 to be computed at the *inferior olive*, the classical teacher of the cerebellar cortex<sup>6,7</sup>. This is defined by the difference  
 544 between cerebellar output and a target feedback signal  $\bar{fb}_t$ , i.e.  $E_t^{IO} = \|C(a_t) - \bar{fb}_t\|$ . Similar to the cerebral network  
 545 we update cerebellar parameters using gradient descent:  $\Psi \leftarrow \Psi - \alpha^{IO} \Delta\Psi$ , where  $\Delta\Psi = \frac{\partial E^{IO}}{\partial \Psi}$ .

546 Ideally we would simply set the target feedback as the true (desired) cerebral feedback. However, this would  
 547 require an arbitrary long number of steps of true cerebellar feedback, exactly what we propose that is not required  
 548 with a cerebellar network. How should the cerebellum itself learn about the future feedback? One elegant solution,  
 549 which we take from Jaderberg et al.<sup>33</sup>, is to combine the currently available error with bootstrapped future cerebellar  
 550 predictions (i.e. self-predictions). Formally, using the same notation as equation 1, the trained target for  $C(a_T)$  is

$$\bar{fb}_T = \frac{\partial E_{\leq 2T}}{\partial a_T} + C(a_{2T}) \frac{\partial a_{2T}}{\partial a_T} \quad (2)$$

551 Note the resemblance of equation 2 to equation 1: in each case we consider a mixture of nearby “cerebral” error  
552 signals beyond which we rely on cerebellar prediction. It is also useful to compare equation 2 with standard reinforce-  
553 ment learning rules (e.g. temporal difference learning algorithm) which rely on similar bootstrapping principles<sup>60</sup>.

## 554 Other biological mappings of our framework

555 Here we describe other possible mappings between the proposed framework (cerebellum as a decoupling machine)  
556 and forward and feedback processing in the cerebral cortex.

### 557 Cerebellum as a spatial feedback decoupler

558 Our paper focuses on temporal problems being solved by a cerebral area modelled as a recurrent neural network  
559 (RNN) to which a cerebellar network provides predictions of the future errors/feedback with respect to that area. An  
560 analogous biologically relevant system also arises, however, when one considers cerebral processing in space using  
561 feedforward computations involving several distinct regions (Fig. S1).

562 This setup - where the “main” (cerebral) network is a feedforward composition of multiple brain regions - was also  
563 considered in Jaderberg et al.. Now, as opposed to predicting errors which occur strictly at later points in time, the role  
564 of the cerebellar network is to predict errors which occur in later brain regions. The result is that an earlier region has  
565 access to its feedback (predicted by the cerebellum) without the need to wait for the later forward/back propagation  
566 of spatial activity. Formally, if we assume cerebral processing as a sequence  $\{a_i\}_{i=1}^N$  of feedforward computations:  
567  $A(x) = (a_N \circ a_{N-1} \circ \dots \circ a_1)(x)$  which defines a final error function  $E(A(x))$ , then the cerebellar network can provide  
568 predicted feedback at a given brain area as soon as its activities are computed:  $C(a_i) := \hat{fb}_i = \frac{\partial E}{\partial a_i} \approx \frac{\partial E}{\partial a_i}$ .

569 This perspective would effect feedback processing across the brain. This interpretation of the model is consistent  
570 with cerebellar-thalamo-cerebral projections targeting distal dendrites, which have been proposed as the site of error  
571 or feedback encoding which underlie efficient learning<sup>68,69</sup>.

### 572 Cerebellum as a forward decoupler

573 In classical cerebellar theory, the complement to the forward model hypothesis is the inverse model, in which the  
574 cerebellum predicts motor commands<sup>5</sup>, or even implicit mental predictions to solve a problem<sup>24</sup>, directly. Again we  
575 can consider this under the proposed framework, but now using its *forward* prediction version.

576 In this case the role of the cerebellum is not to predict future feedback activity, but the feedforward activity itself,  
577 i.e.,  $C(a_i) = \hat{a}_j$  for some later region  $j > i$ .  $\hat{a}_j$  is fed as a replacement to region  $j$ , making it forward decoupled from a  
578 potentially slower intermediate processing  $a_j \circ a_{j-1} \circ \dots \circ a_{i+1}$ .

579 Functionally this would provide the organism with fast inputs (e.g. motor commands or potential mental solutions)  
580 without the need for potentially slower cerebral processing (Fig. S1b). We also point out the relevance of direct predic-  
581 tions of later activity in the temporal case, where the cerebellum strictly predicts motor activity at later timesteps, as  
582 suggested in<sup>80</sup>. A broad comparison between this framework and the cerebellar internal model hypothesis is shown  
583 in Table S1.

## 584 Experimental details

585 To reduce learning instability we scale the cerebellar predicted feedback (Eq. 1) by 0.1<sup>33</sup>. Both cerebral and cerebellar  
586 parameters are optimised using the feedback described above together with ADAM for overall learning efficiency<sup>81</sup>.  
587 Training the model involves iterating over training sessions for a given dataset, which is split into batches. For better  
588 learning stability model parameters were updated at the end of each batch.

589 In each experiment all initial RNN parameters are drawn from an uniform distribution  $\mathcal{U}(-\frac{1}{\sqrt{n_{\text{RNN}}}}, \frac{1}{\sqrt{n_{\text{RNN}}}})$ , where  
590  $n_{\text{RNN}}$  is the number of RNN units. The weights of the readout network and the feedforward weights of the cerebellar  
591 network (other than the final layer) are initialised according to  $\mathcal{U}(-b_k, b_k)$  where  $b_k$  denotes the “kaiming bound” as  
592 described by He et al.<sup>82</sup> (slope  $a = \sqrt{5}$ ), and the biases are drawn from  $\mathcal{U}(-\frac{1}{\sqrt{n_{\text{in}}}}, \frac{1}{\sqrt{n_{\text{in}}}})$ , where  $n_{\text{in}}$  denotes the input size  
593 of the layer. The last layer (both weights and bias) of the cerebellar network is zero-initialised, so that the estimated  
594 feedback at the start are zero<sup>33</sup>.

595 During learning, we employ truncated BPTT as follows. Given an input sequence of  $N$  timesteps  $x_1, x_2, \dots, x_N$  and  
596 an temporal horizon  $K$ , we divide the sequence into  $K$  sized truncations. In other words, the sequence is now made

597 up truncations of  $(x_1, \dots, x_K), \dots, (x_{(m-1)K+1}, \dots, x_{mK}), (x_{N-r}, \dots, x_N)$ , where  $N = mT + r$  for positive integers  $m, r$  with  
598  $0 \leq r < K$ . Note that, along with the value  $K$ , how well the sequence is divided into truncations (i.e. values  $m, r$ ) can  
599 itself influence learning (e.g. Fig. 3d).

600 In the all visuomotor tasks, to test the effect of predicted feedback against the availability of task feedback signals  
601 which occur at any timestep where an external teaching signal is provided, we vary the *external feedback interval*.  
602 Given feedback interval  $n$ , the target is only available every  $n$  timesteps. This is analogous to the rate at which one  
603 receives sensory information whilst performing a task (e.g. drawing freehand).

604 In general, (standard) hyperparameters were selected by hand after a few trial runs. We used the PyTorch library  
605 for all neural network models. Our implementation is based on that of [github.com/koz4k/dni-pytorch](https://github.com/koz4k/dni-pytorch). The code used  
606 for our experiments is available at <https://github.com/neuralml/ccDNI>.

### 607 Delta and normalised error

608 To calculate the delta and normalised error with respect to a given model we take the difference or ratio of total  
609 errors during learning (all training sessions). For example, the normalised error of ccRNN with respect to cRNN is  
610  $\frac{\text{error}(\text{ccRNN})}{\text{error}(\text{cRNN})}$ . Note that in the ablation case we compare against an "healthy" ccRNN and only consider the respective  
611 errors post-ablation. e.g. the normalised error for a model with cerebellar ablation at session 50 is  $\frac{\text{error}(\text{ablated})_{>50}}{\text{error}(\text{ccRNN})_{>50}}$ .

### 612 Cerebro-cerebellar coupling

613 To analyse how the coupling between the cerebral and cerebellar networks changes over learning we consider the  
614 (absolute) Pearson correlation between a given cerebral (LSTM) unit and a given unit in the cerebellar hidden (gran-  
615 ular) layer over different bins during training. Values given are the average correlation over all RNN/cerebellar unit  
616 pairs.

### 617 Computing details

618 All experiments were conducted on the BluePebble super computer at the university of Bristol; mostly on GPUs  
619 (GeForce RTX 2080 Ti) and some on CPUs. We estimate the total compute time (including unreported results) to be  
620 in the order of  $\sim 2000$  hours.

### 621 Simple line drawing visuomotor task

622 In the line drawing task, an LSTM network receives a discrete input cue which signals the network to either (1.) stay at  
623 zero or (2.) draw a line in 2D space over a period of 10 timesteps. Here we set 6 distinct non-zero input-target pairs  
624  $\{(x_i, y_i)\}_{i=1}^6$ , where each input  $x_i$  is a (one dimensional) integer  $\in \{\pm 1, \pm 2, \pm 3\}$ ,  $y_1 = 0$  throughout, and the remaining  
625 targets  $\{y_i\}_{i=2}^6$  are lines whose end points lie equidistantly on a circle centred on the origin with radius 10. To make  
626 the task more realistic we also consider a 7th target in which the network must remain quiet at the centre of the  
627 drawing screen, which models periods in which the animal is not actively performing the task. Once an input cue  
628 is received at timestep  $t_0$ , the model receives no new information (i.e. all future input is set to zero). The model is  
629 trained to minimise the mean squared error (MSE) between its output and the cue-based target.

630 The cerebral network is modelled by one hidden layer of 50 LSTM units and the cerebellar network by one hidden  
631 layer of 400 neurons. The learning rate is set to 0.001. Each epoch comprises of 20 batches with 50 randomised  
632 examples. Unless explicitly stated we use a truncation size of  $K = 1$  which covers 10% of the total task duration.  
633 Model results are averaged over 10 random seeds (with error bars), where each seed determines the initial weights  
634 of the network.

### 635 Online visuomotor tasks

636 For each online visuomotor task (Fig. 3) we use a standard dataset of handwritten digits (MNIST dataset). The model  
637 receives the same temporal input input, and the tasks are only differentiated by the desired model output. Given a  
638  $28 \times 28$  handwritten digit as input, at timestep  $i$  the model receives the pixels from row  $i$  of the image, so that the  
639 input is of dimension 28 and is presented over 28 timesteps.

640 In each case we have one hidden layer of 30 LSTM units in the main model and one hidden layer of 300 hidden  
641 units in the feedforward cerebellar network. Data was presented in batches of 50 with a learning rate of 0.0001.

642 Training and validation data was assigned a 4 : 1 split, containing 48000 and 12000 distinct image/number pairs  
643 respectively. Unless explicitly stated, the truncation value was  $K = 3$  which is  $\sim 10\%$  of the task duration. Model  
644 results are presented over 10 random seeds.

#### 645 Online line drawing visuomotor task

646 In this variant each number 0-9 MNIST image is allocated an associated  $xy$  position on the edge of a circle centred at  
647 0 with radius 10, and must follow a line of equally spaced points towards that position (Fig. 3a, left). With the model  
648 output being a vector of size 2, the training loss is defined at the end by the mean squared error (MSE) between the  
649 output of the model and the points forming the target line.

#### 650 Online digit drawing visuomotor task

651 Like the online line drawing task, in this variant the model outputs a sequence of 2D coordinates corresponding to  
652 the input image. The target sequence however is now of a highly non-linear form, and in this case is a template of  
653 the number given as input (Fig. 3a, middle). The model is then trained at to minimise the MSE between the model  
654 output and that target shape.

655 For each digit, the corresponding target drawing lies in  $[0, 1] \times [0, 1]$ , such that the gap between each successive  
656 point is equivalent. All model drawings begin in the top left corner (except for digit 1 which begins below-right). MSE  
657 scores are reported as 100 times their raw values to ease comparison with the line drawing case.

#### 658 Online visual discrimination

659 This case differs to the others as it is a classification (or decision making) task, where at the end of the presentation  
660 of the MNIST image the model must decide which number the digit belongs to (between 0 and 9). Since the decision  
661 is only made at the end of the sequence and targets are unavailable at intermediate points, this is a task with hard  
662 temporal credit assignment. The output of the model is a vector with probabilities of size 10 (one entry for each  
663 number), and the model was trained to maximise the likelihood of the target number using a standard cross-entropy  
664 error function.

#### 665 Visual-language task

666 The architecture for the caption generation task consists of a pretrained convolutional neural network (CNN) coupled  
667 with an RNN (LSTM). The cerebellar network only communicates with the LSTM. The LSTM network has one layer of  
668 256 LSTM units and the cerebellar network has two hidden layers (i.e. here we explicitly model a layer of Granule  
669 Cells and one of Purkinje Cells) of 1024 neurons.

670 The process from image to model-generated caption follows previous work<sup>83</sup> and is described next. As part of im-  
671 age preprocessing and data augmentation, which helps prevent model overfitting, a given image is randomly cropped  
672 to size  $224 \times 224$ , flipped horizontally with even chance, and appropriately normalised to be given to a pretrained  
673 Resnet model<sup>84</sup>. A feature vector  $X$  of size 256 is thus obtained and passed to the LSTM at timestep 0. The LSTM  
674 is subsequently presented the “gold standard” caption  $\{w_i\}_{i=1}^n$  one word per timestep, each time learning to predict  
675 the next word (unsupervised task); i.e., at timestep  $t$  the model learns  $P(w_t|X, \{w_i\}_{i=1}^{t-1})$ . The network simultaneously  
676 learns a word embedding so that each word  $w_i$  is first transformed to a feature vector of size 256 before being given  
677 as input to the LSTM (as illustrated in (Fig. 8a). With a preset vocabulary of 9956 distinct words, the final output of the  
678 model ( $P(w_i)$ ) is a probability vector of size 9956.

679 We found the models to be generally prone to overfitting the training data. For this reason, we apply dropout  
680 (during training as described by Srivastava et al.<sup>85</sup>) on the input to the LSTM, where a given input element is set to  
681 zero with  $p = 0.5$  probability. Once training is complete the models can generate their own captions to previously  
682 unseen images (Figs. 8, S10). Given an image at timestep 0, the model output at timestep  $i$  is the word with the  
683 highest probability, and the same word is then provided as input to the model at timestep  $i + 1$ . In this way the model  
684 can autonomously output an entire sequence of words which forms a predicted caption. In the (highly) rare case  
685 where the model generates a sequence of  $> 20$  words, we consider only the first 20 words as its caption.

686 We used the COCO training data set ILSVRC-2012-CLS<sup>1 50</sup> which holds 414113 image-caption pairs with 82783

---

<sup>1</sup>This is a commonly used dataset available for our purposes under a Creative Commons license.

687 unique images while the held-out validation set (used for Fig. 8b, c) holds 202654 with 40504 unique images; note  
688 that each image therefore has  $\sim 5$  distinct gold standard captions. Training takes place in batches of 100 image-  
689 caption pairs, with a learning rate of 0.001. Model performance is averaged over 10 random seeds. The performance  
690 is quantified in bits per word, which measures how good the model is at predicting the validation set. More specifically  
691 if a model assigns high probability to the test set (low BPW) it means it is not surprised by it hence indicating a good  
692 understanding of the language.

693 In order to judge the models beyond their learning curves in BPW, we quantify their ability to generate captions  
694 using variety of language modelling metrics popular in the field of language evaluation. In particular, we compare  
695 model-generated captions against the gold standard captions using standard metrics in language modelling. We use  
696 the Semantic Propositional Image Caption Evaluation or SPICE metric, referred to as caption score. This metric has  
697 been shown to be more accurate as it better captures the semantic structure of the generated captions<sup>52</sup>.

698 Our code implementation is based on [https://github.com/yunjey/pytorch-tutorial/tree/master/tutorials/03-advanced/  
699 image\\_captioning](https://github.com/yunjey/pytorch-tutorial/tree/master/tutorials/03-advanced/image_captioning).

### 700 Demixed principal component analysis

701 To study the response dynamics specific to task variables we perform demixed principal component analysis (dPCA)<sup>86</sup>.  
702 Demixed PCA extracts low-dimensional components that explain maximum population variance constrained by task-  
703 specific variables, such as the input stimulus. As a result we obtain principal components that are specific to task  
704 variables. The simulated neural data we provide as input to dPCA is a three-dimensional array ( $n, s, t$ ) with neuronal  
705 activity (concatenated across seeds), stimulus identity and time, respectively.

### 706 Statistical analysis

707 Because the initial conditions of these type of models influence its learning trajectory we run our models across 10  
708 different randomly chosen seeds. Significance was then tested using a paired t-test across the different seeds on the  
709 relative changes (e.g. ccRNN relative to cRNN). Significance levels are represented as \* ( $p < 0.05$ ), \*\* ( $p < 0.01$ ), \*\*\*  
710 ( $p < 0.001$ ) and \*\*\*\* ( $p < 0.0001$ ).

### 711 Measuring cerebro-cerebellar feedback similarity

712 The learning curves of ccRNN plotted against cRNN with a limited feedback horizon highlights the benefit of the  
713 feedback predicted by the cerebellar network. This indicates that the predicted feedback can indeed approximating  
714 the desired cerebral feedback. To verify this, we quantified the cerebro-cerebellar feedback similarity using cosine  
715 similarity - "cossimilarity" - between the predicted feedback and the optimal temporal cerebral feedback (as derived  
716 by gradient descent). Specifically given two arbitrary vectors  $\mathbf{x}$  and  $\mathbf{y}$

$$\text{cossimilarity}(\mathbf{x}, \mathbf{y}) = \frac{\mathbf{x} \cdot \mathbf{y}}{\|\mathbf{x}\|_2 \|\mathbf{y}\|_2} \quad (3)$$

717 where  $\mathbf{x}$  is the predicted feedback and  $\mathbf{y}$  the true optimal feedback,  $\cdot$  denotes the dot product and  $\|\cdot\|_2$  the Euclidean  
718 norm.

719 It is important to emphasise that the true feedback is never actually provided to the model (as it goes beyond  
720 the feedback horizon  $K$  considered). Instead the cerebellum only learns through a combination of cerebral feedback  
721 within horizon  $K$  and a bootstrapped term (see details above). This measure allow us to evaluate how much informa-  
722 tion about this ideal feedback can the cerebellum approximate. The final result is shown in Fig. 5a. To provide the  
723 reader with intuition about how having external feedback available just at the end, which would lead to a gradual loss  
724 of the ability of the cerebellum to make good predictions for earlier points in the task, we highlight two task variants  
725 in which the task error is only defined at the end visual discrimination and a simple line drawing variant where the  
726 external task feedback is only provided at the end of the task.

727 **Supplementary Information**

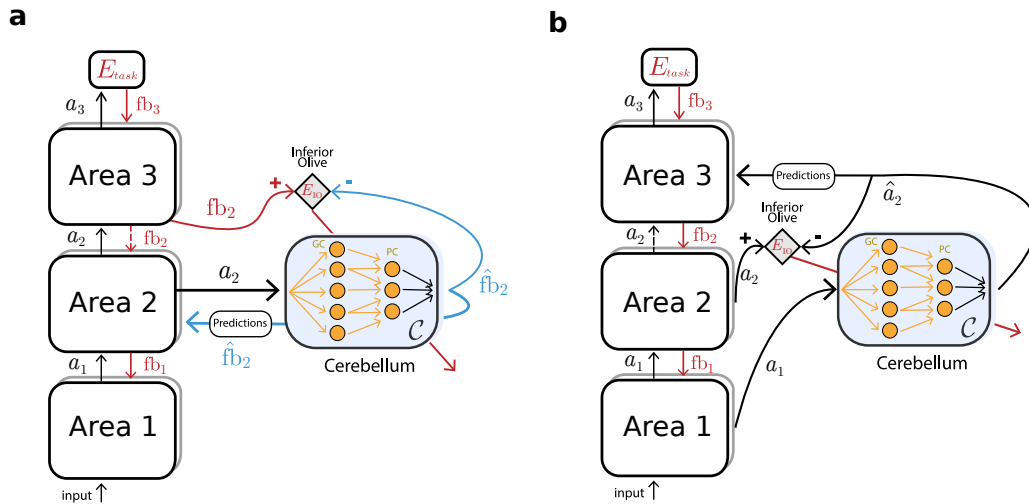

**Supplementary Figure S1.** Cerebellum as decoupling machine in feedforward multi-area networks. **(a)** Illustration of decoupling feedback processing. The cerebellum makes predictions of the feedback expected by brain area 2, decoupling the main network from downstream brain areas (dashed red arrow). **(b)** Case of decoupling feedforward processing. The cerebellum predicts the forward activity expected by brain area 3, thereby approximating (and decoupling) the forward computations between brain area 1 and 3 (dashed black arrow). Note that the cerebellum could, in principle, approximate feedback and feedforward processing across many more brain areas (i.e. brain area 2 could be expanded in multiple brain areas).

**Supplementary Table S1.** Relationship between the internal models of the cerebellum with decoupling machines<sup>33</sup>. The properties of the forward model of the cerebellum can be set against those of feedback decoupling (blue); similarly, the properties of the inverse model of the cerebellum can be set against those of forward decoupling (red). The internal models here focus on the classical motor control setting but can be extended to cognition, where for example a “mental model” replaces the “controlled object”<sup>24</sup>. Abbreviations: MM, main model; temp., temporal; spat. spatial.

|                           | Forward Model           | Feedback Decoupling                                    | Inverse Model         | Forward Decoupling                                   |
|---------------------------|-------------------------|--------------------------------------------------------|-----------------------|------------------------------------------------------|
| <i>controller</i>         | cerebral (motor) cortex | main model (MM)                                        | cerebellum            | synthesiser                                          |
| <i>input</i>              | motor state/command     | area state*                                            | sensory/desired state | (temp.) area state*<br>(spat.) upstream state*       |
| <i>output prediction</i>  | future state            | (temp.) future gradient<br>(spat.) downstream gradient | motor command         | (temp.) future state<br>(spat.) downstream state     |
| <i>output destination</i> | cerebral (motor) cortex | MM: same area                                          | controlled object     | (temp.) MM: same area<br>(spat.) MM: downstream area |

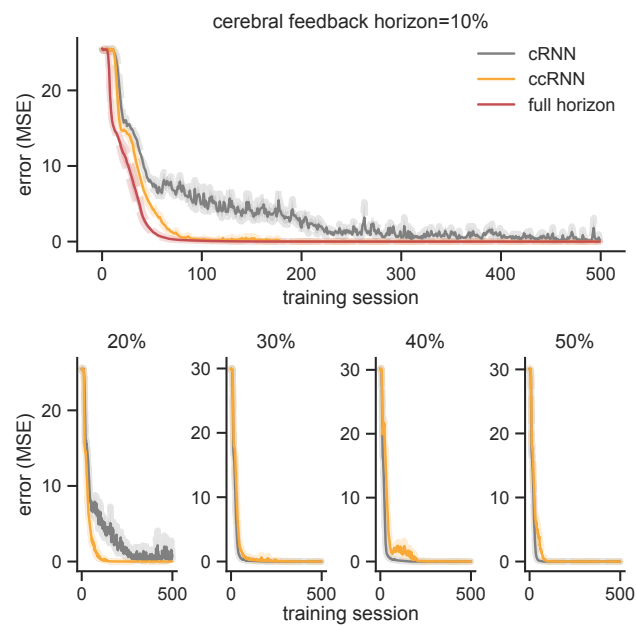

**Supplementary Figure S2.** Learning for different cerebral feedback horizons for the line drawing task (cf. Fig. 2d). Feedback horizon is given as percentage of task duration (10 time steps). Results presented in main text (Fig. 2b) shown on top row along with RNN trained with full horizon (i.e. cerebral feedback horizon = 100%).



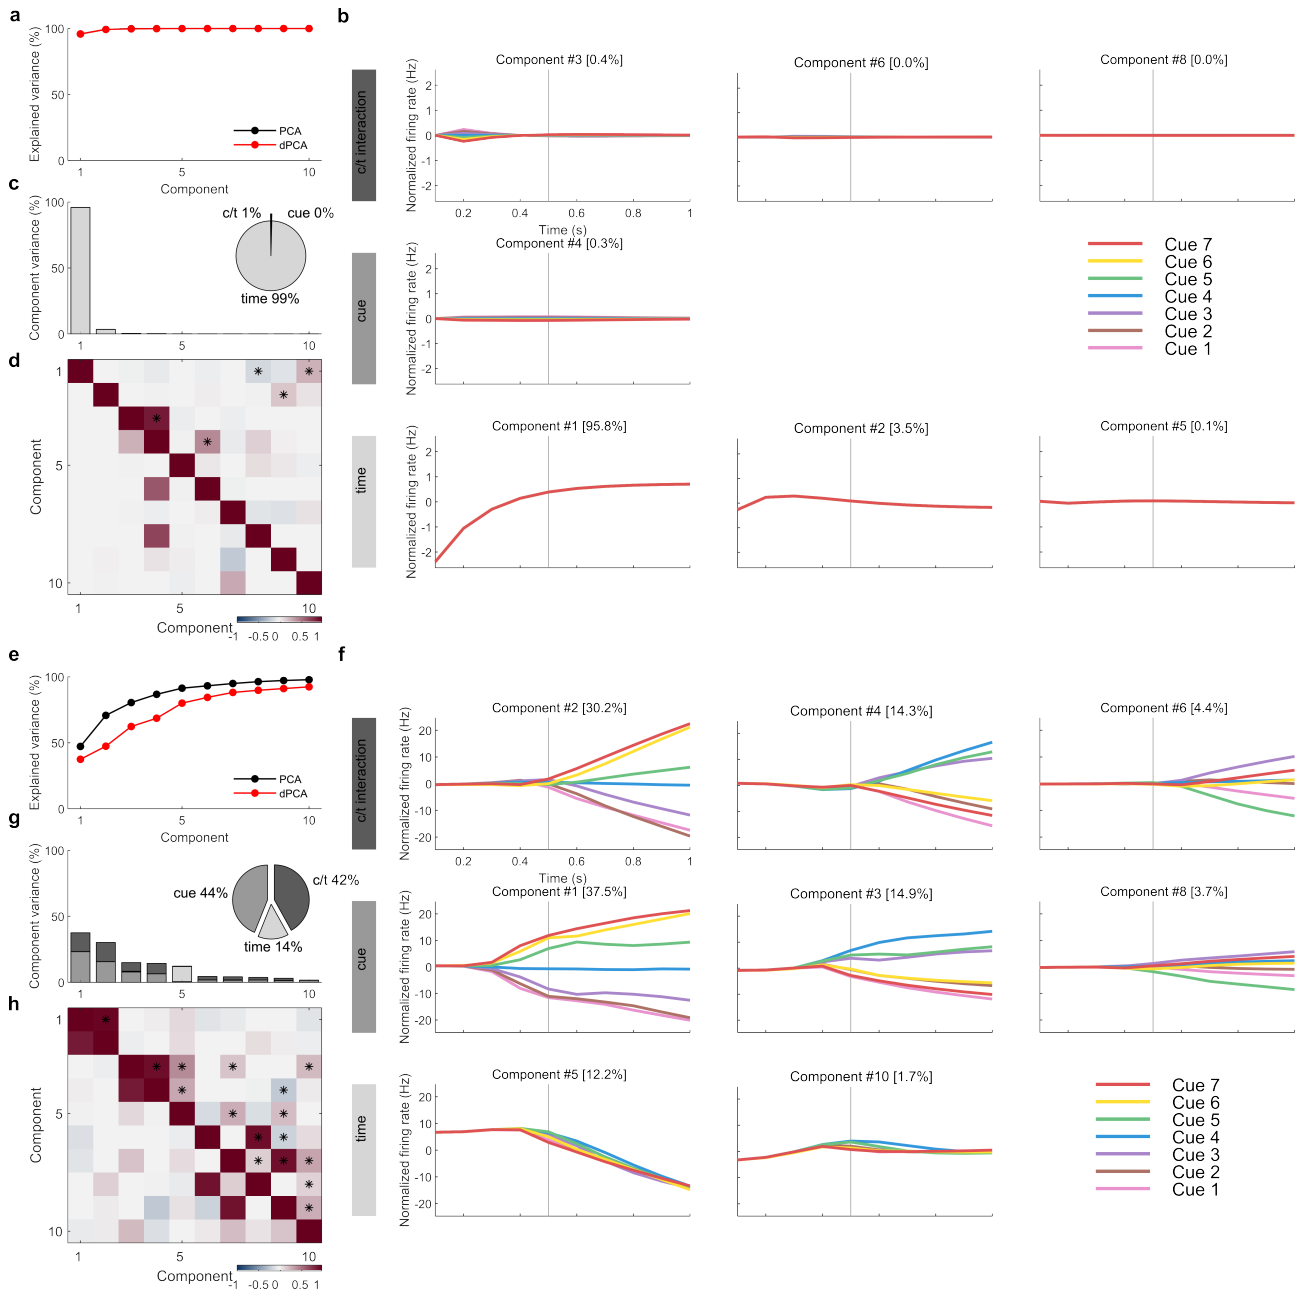

**Supplementary Figure S3.** Demixed PCA of cRNN network at the beginning and end of learning (cf. Fig. 2e,f). Early and late learning corresponds to training session 1 (top a-d) and 200 (bottom e-h), respectively. **(a, e)** Cumulative variance explained by PCA (black) and dPCA (red) components. **(b, f)** Demixed principal components for cue, time and cue/time interaction task variables. In each subplot there are 7 lines corresponding to the 7 cues (cf. Fig. 2a). **(c, g)** Explained variance for individual demixed principal components. Pie chart shows how the total variance is split between different task variables. **(d, h)** Dot product between all pairs of the first 15 demixed principal components (upper-right triangle) and correlations between all pairs of the first 10 demixed principal components (bottom-left triangle). Stars denote statistical significance ( $p < 0.05$ ).

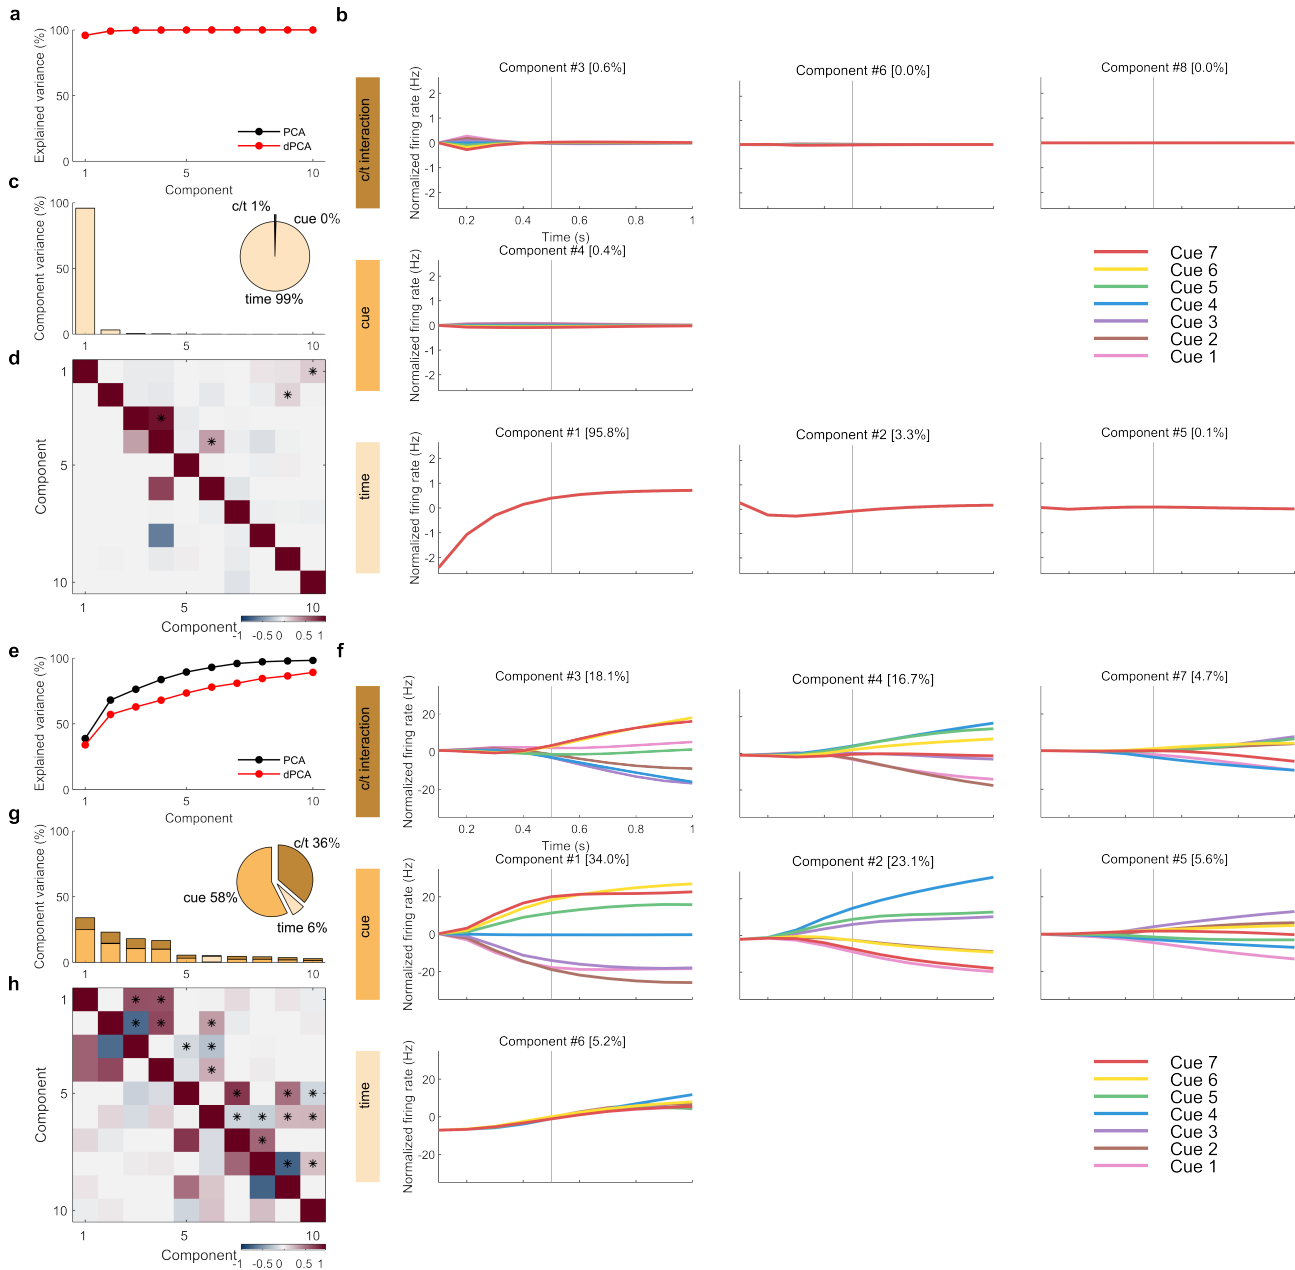

**Supplementary Figure S4.** Demixed PCA of ccRNN cerebral network at the beginning and end of learning (cf. Fig. 2e,f). Early and late learning corresponds to training session 1 (top a-d) and 200 (bottom e-h), respectively. **(a, e)** Cumulative variance explained by PCA (black) and dPCA (red) components. **(b, f)** Demixed principal components for cue, time and cue/time interaction task variables. In each subplot there are 7 lines corresponding to the 7 cues (cf. Fig. 2a). **(c, g)** Explained variance for individual demixed principal components. Pie chart shows how the total variance is split between different task variables. **(d, h)** Dot product between all pairs of the first 15 demixed principal components (upper-right triangle) and correlations between all pairs of the first 10 demixed principal components (bottom-left triangle). Stars denote statistical significance ( $p < 0.05$ ).

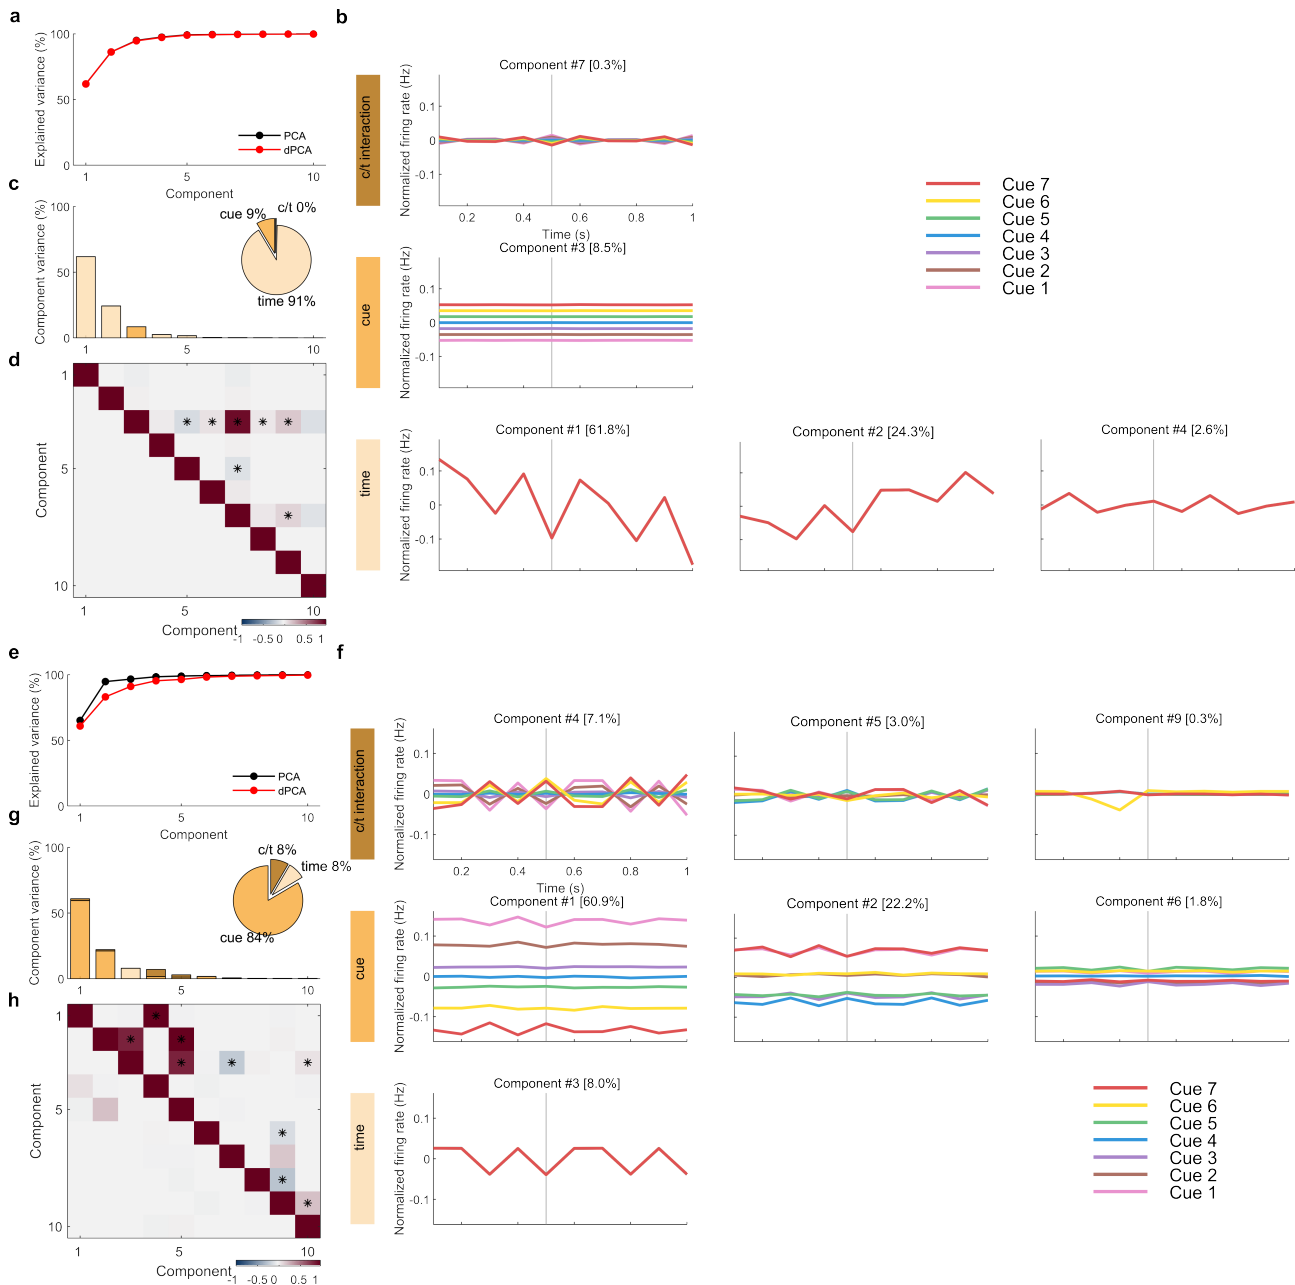

**Supplementary Figure S5.** Demixed PCA of ccRNN cerebellar network at the beginning and end of learning (cf. Fig. 2g,h). Early and late learning corresponds to training session 1 (top a-d) and 200 (bottom e-h), respectively. **(a, e)** Cumulative variance explained by PCA (black) and dPCA (red) components. **(b, f)** Demixed principal components for cue, time and cue/time interaction task variables. In each subplot there are 7 lines corresponding to the 7 cues (cf. Fig. 2a). **(c, g)** Explained variance for individual demixed principal components. Pie chart shows how the total variance is split between different task variables. **(d, h)** Dot product between all pairs of the first 15 demixed principal components (upper-right triangle) and correlations between all pairs of the first 10 demixed principal components (bottom-left triangle). Stars denote statistical significance ( $p < 0.05$ ).

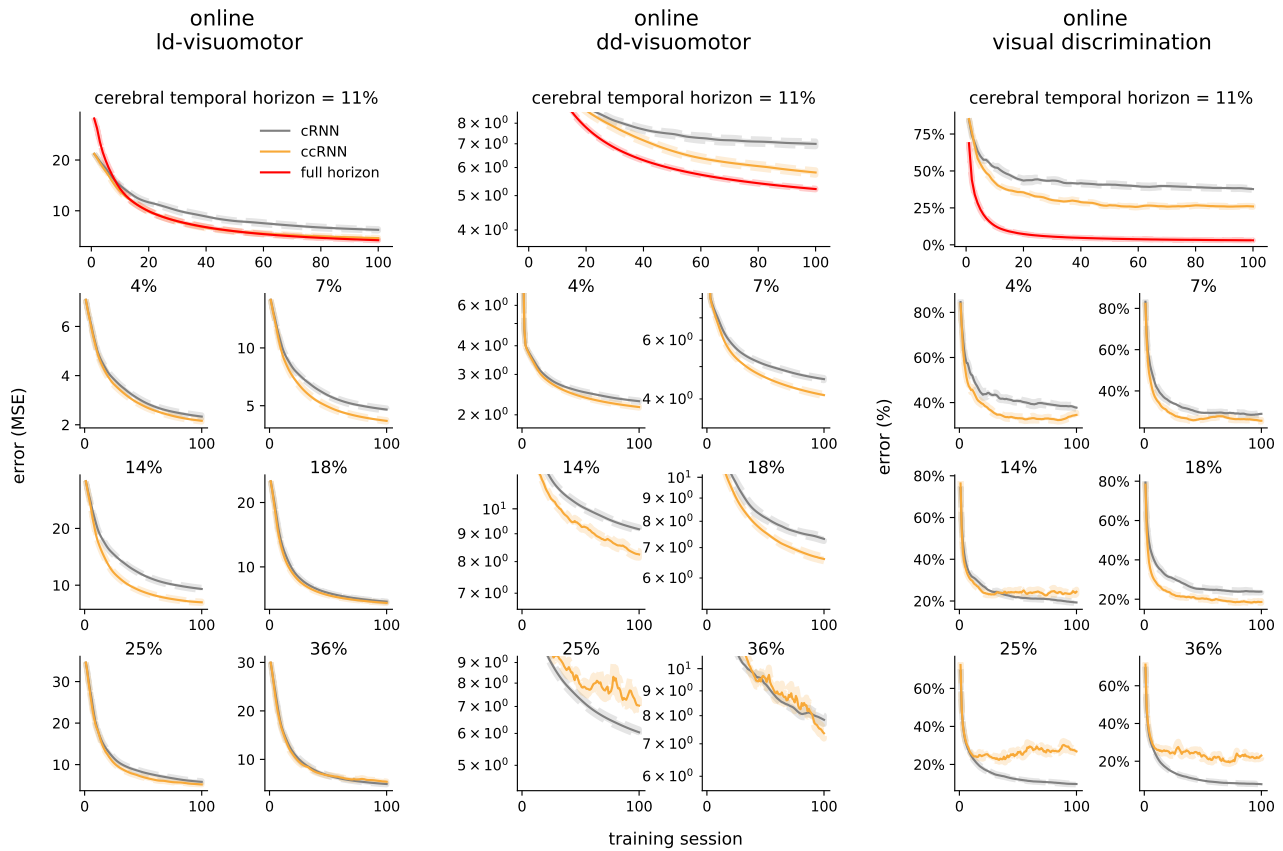

**Supplementary Figure S6.** Learning for different cerebral feedback horizons for the online visuomotor and discrimination tasks (cf Fig. 3d). Feedback horizon is given as percentage of task duration (28 timesteps). Results presented in main text (Fig. 3b) shown on top row along with RNN trained with full horizon (i.e. cerebral feedback horizon = 100%).

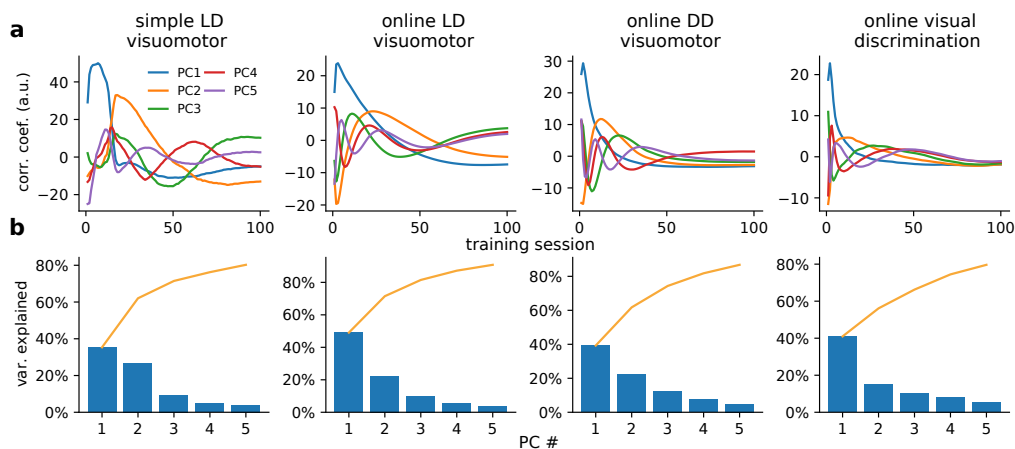

**Supplementary Figure S7.** Pair-wise correlations over learning. (a) extension of Fig. 6b for top 5 principal components. (b) Variance explained by each component (accumulation in orange).

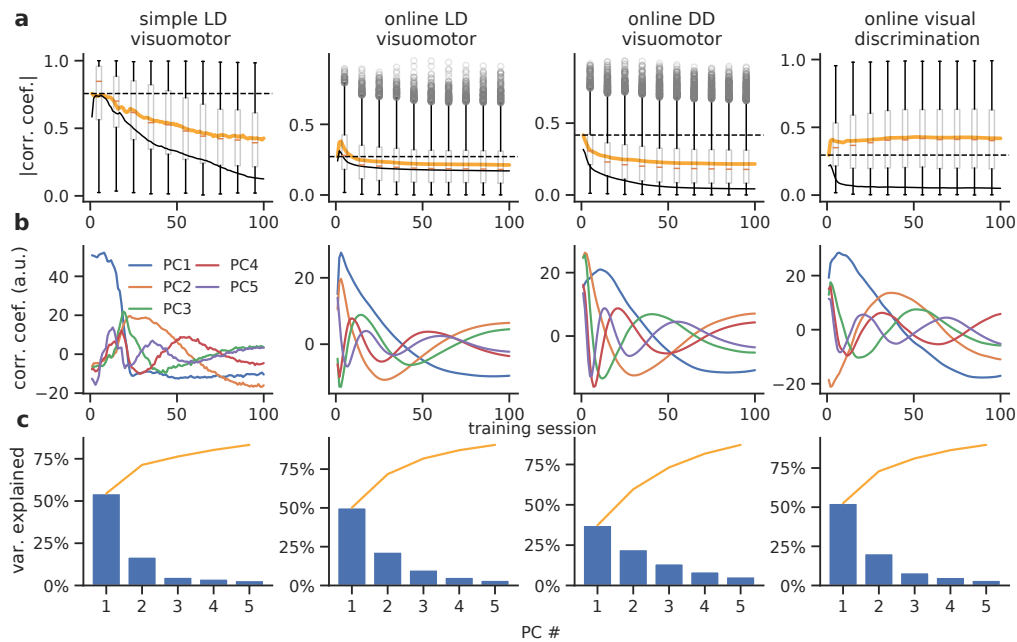

**Supplementary Figure S8.** Pair-wise correlations over learning with a *fixed* cerebellar module. **(a)** Box plot showing the mean and distribution of pair-wise cerebro-cerebellar correlations over learning. Mean correlation coefficient for the fully plastic ccRNN model (solid black line) and fully fixed ccRNN (i.e. without any form of plasticity in both cerebral and cerebellar networks; dashed black line) are given for reference. **(b)** Top 5 principal components. **(c)** Variance explained by each component (accumulation in orange).

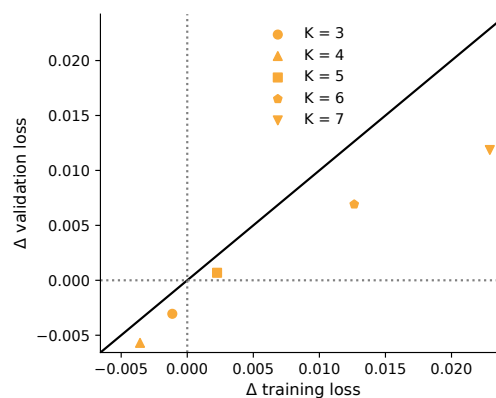

**Supplementary Figure S9.** Generalisation of ccRNN (orange scatter) for feedback horizons  $K$  from 3 to 7. The change in loss is computed with reference to the cRNN (i.e. ccRNN - cRNN). Training loss is calculated *after* training for a fair comparison with final validation performance.

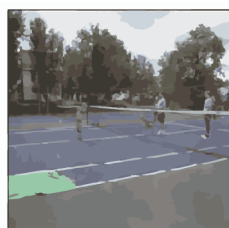

a man is playing tennis on a court  
**a tennis player is getting ready to hit a ball**  
 a group of people that are standing on a tennis court  
 a group of people who are on a tennis court a few people that are playing tennis on a court  
 a group of people standing on top of a tennis court  
 some people standing on a tennis court holding tennis rackets

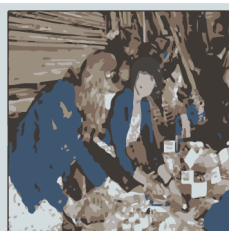

a woman is sitting in a chair with a stuffed bear  
**a woman is holding a teddy bear in a kitchen**  
 two women reaching for food on a table  
 two women prepare a table for a bake sale women holding cakes on some kind of cake sale  
 women are cutting and looking at desserts on a table  
 two women getting some food on a table

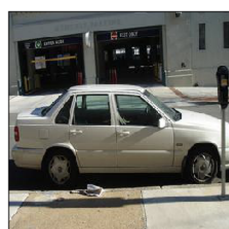

a parking meter on a street corner with a car parked on the side of the road  
**a car parked on the side of a road**  
 a white car parked next to a parking meter in front of a parking garage  
 white four door automobile parked on the street by a meter a white car parked at a meter on a curb side  
 white car parked at curb with parking meter in city setting  
 a car is parked next to a meter

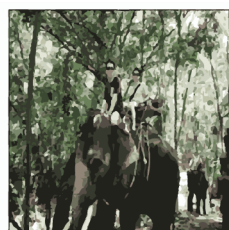

a man and a woman are riding elephants down a road  
**a man riding an elephant with a woman in the back**  
 an elephant strolling through a trail with two people on its back  
 two young people setting on top of a big elephant two people ride on top of a large elephant  
 a pair of people ride on the back of an elephant  
 two people riding on the back of a large elephant

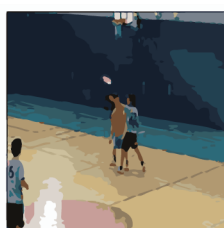

tennis player is getting ready to hit the ball  
**tennis player is getting ready to hit a ball**  
 man throwing a white frisbee in a gym  
 people on an inside court playing with a frisbee three men playing frisbee on an indoor court.  
 three young adults are playing frisbee on a court  
 group of young people playing frisbee in a gym

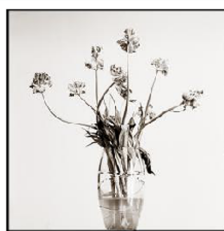

a bunch of birds perched on top of a tree branch  
**a black and white photo of a vase of flowers**  
 a clear vase that has some flowers in it  
 a vase with some water and dead flowers in it some flowers in a clear vase filled with water  
 a flower and vase that are in the water  
 a glass vase of many flowers with water inside

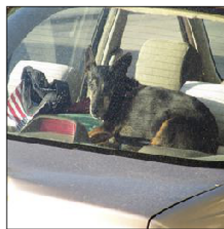

a dog is sitting on a car seat with a dog on the back of a car  
**a dog is sitting on a car dashboard**  
 A medium-sized black dog lies in the back of a car  
 a dog that is sitting in the rear window of a vehicle a small dog is sitting near the back window of a car  
 a dog sitting in the back window of a car  
 a dog sitting up in a car window

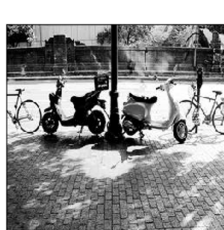

a black and white photo of a motorcycle parked on the side of the road  
**a motorcycle parked on the side of a road**  
 mopeds and bicycles parked next to parking meters  
 two vespas parked next to a light post two mopeds and two bicycles locked up in a row  
 this is an image of scooters and bicycles  
 mopeds are parked near bicycles on the sidewalk

**Supplementary Figure S10.** Example images and captions from the validation set with corresponding model captions (cRNN in grey and ccRNN in orange) and gold standard captions (black). Here we show a combination of examples of how the models describe the presented image. In some case all or some models fail to give an accurate description of the image. In other cases all models are able to provide an accurate caption for the image, with each model displaying subtle differences in the generated captions.
